# 1 **3D models of Alzheimer's disease patient microglia recapitulate disease phenotype** 2 **and show differential drug responses compared to 2D**

3 Carla Cuní-López<sup>1†</sup>, Hazel Quek<sup>1†\*</sup>, Lotta E. Oikari<sup>1</sup>, Romal Stewart<sup>1</sup>, Tam Hong Nguyen<sup>2</sup>, Yifan Sun<sup>1</sup>,  
4 Christine C. Guo<sup>3</sup>, Michelle K. Lupton<sup>3</sup>, Anthony R. White<sup>1\*</sup>

5 <sup>1</sup>Cell & Molecular Biology Department, QIMR Berghofer Medical Research Institute, Brisbane,  
6 Queensland, Australia

7 <sup>2</sup>Scientific Services, QIMR Berghofer Medical Research Institute, Brisbane, Queensland, Australia

8 <sup>3</sup>Genetics & Computational Biology Department, QIMR Berghofer Medical Research Institute,  
9 Brisbane, Queensland, Australia

10 <sup>†</sup>These authors contributed equally to this work

11 \*Correspondence: [Tony.White@qimrberghofer.edu.au](mailto:Tony.White@qimrberghofer.edu.au); [Hazel.Quek@qimrberghofer.edu.au](mailto:Hazel.Quek@qimrberghofer.edu.au)

## 12 **Abstract**

13 Alzheimer's disease (AD) is an incurable neurodegenerative disorder with a rapidly increasing  
14 prevalence worldwide. Current approaches targeting hallmark pathological features of AD have had  
15 no consistent clinical benefit. Neuroinflammation is a major contributor to neurodegeneration and  
16 hence, microglia, the brain's resident immune cells, are an attractive target for potentially more  
17 effective therapeutic strategies. However, there is no current *in vitro* model system that faithfully  
18 recapitulates patient-specific microglial characteristics. To address this shortcoming, we developed  
19 novel 3D models of monocyte-derived microglia-like cells (MDMi) from AD patients. MDMi in 3D  
20 exhibited mature microglial features, including a highly branched morphology and enhanced bonafide  
21 microglial marker expression compared to 2D. Moreover, AD MDMi in 3D co-cultures with neuro-  
22 glial cells showed altered cell-to-cell interactions, growth factor and cytokine secretion profiles and  
23 responses to amyloid- $\beta$ . Drug screening assays in 3D AD MDMi revealed different cytokine responses  
24 compared to 2D. Our study demonstrates disease- and drug-specific responses in 3D MDMi models  
25 that are not apparent in 2D and presents a new 3D platform for more effective and personalised drug  
26 testing.

## 27 **Introduction**

28 Alzheimer's disease (AD) is a complex age-related neurodegenerative disorder involving progressive  
29 impairment of cognitive functions, with distinct pathogenicity and clinical phenotypes among patients.  
30 Predictions estimate that AD, together with other neurodegenerative diseases, will become the second  
31 leading cause of death in the next 20 years (1). Nevertheless, no prevention strategies or cure exist  
32 despite major advances in deciphering the molecular basis of AD. The most characteristic  
33 neuropathological hallmarks of AD brains are the presence of extracellular senile plaques, consisting  
34 primarily of misfolded amyloid- $\beta$  (A $\beta$ ) protein, and intracellular neurofibrillary tangles, composed of  
35 hyperphosphorylated tau protein. Accumulation of protein aggregates in the brain parenchyma triggers  
36 multiple deleterious processes, including oxidative stress and mitochondrial dysfunction (2), which  
37 alter brain homeostasis. For decades, reducing the protein aggregate burden in AD brains has been the  
38 main goal of candidate therapeutics, but these strategies have yielded poor outcomes in clinical trials.  
39 The field is therefore in desperate need for more effective drug targets.

40 Chronic neuroinflammation and sustained activation of pro-inflammatory pathways are critical  
41 components of many neurodegenerative diseases, including AD. Recent reports have shown that  
42 neuroinflammation plays a major role in the pathogenesis and progression of AD (3, 4). Microglia, the  
43 resident immune modulators of the brain, are key effectors of neuroinflammation and hence represent  
44 a promising candidate for targeted therapeutics for AD and other neurodegenerative diseases.  
45 Microglia develop aberrant phenotypes under non-homeostatic brain conditions and consequently  
46 mediate multiple pathogenic mechanisms, including neuron and synapse degeneration, that are critical  
47 to the cognitive decline characteristic of AD (5, 6). Moreover, most AD risk gene variants (for example  
48 *TREM2*, *APOE*, *CLU*, *CD33*, *PILRB*, *BINI*, *PLCG2* and *MEF2C*) converge on biological pathways  
49 linked to microglial function (7-12). Recent studies have correlated the responses of diseased microglia  
50 in AD brains with the varied clinical presentations seen among patients. Indeed, the individual's  
51 genetic makeup determines whether diseased microglia will prevent or exacerbate the pathogenic  
52 processes underlying disease in that particular patient's brain (13-15). As such, microglia not only  
53 contribute to the pathology of AD but also show patient-specific characteristics, thus being essential  
54 players in the patient heterogeneity observed in AD.

55 Current *in vitro* model systems used to study the role of microglia in AD (reviewed in (16, 17)) lack  
56 either clinical relevance or physiological complexity, thereby affecting translatability of drug  
57 outcomes into the clinic. Murine microglia lack the ability to fully recapitulate disease phenotypes of  
58 AD patients due to the little resemblance of immune functions and ageing processes between mice and  
59 humans (18-21). Human immortalised microglia cell lines are genetically and functionally very

60 different from *in vivo* microglia (22-24). Freshly isolated primary microglia from AD patients are  
61 normally obtained from post-mortem brains in low yields and rapidly lose microglial phenotypic  
62 signatures upon removal from the brain environment (22). Lastly, human induced pluripotent stem cell  
63 (hiPSC)-derived microglia allow for the generation of a clinically relevant, patient-specific microglia  
64 platform. However, establishing hiPSC-derived microglia requires costly, long and technically  
65 challenging protocols that result in variable differentiation efficiencies (25), and the cells lose patient-  
66 specific traits, including ageing markers, upon reprogramming (26).

67 The monocyte-derived microglia-like cell (MDMi) model system addresses the shortcoming of the  
68 above models and provides a novel, cost-effective approach for the rapid generation of personalised  
69 microglia cultures from living patients. This method has been previously applied by us and others  
70 using *ex vivo* blood-derived monocytes from schizophrenia (27, 28), Nasu-Hakola disease (29) and  
71 amyotrophic lateral sclerosis (ALS) (30) patients, demonstrating disease-associated phenotypes in the  
72 patient-derived MDMi. In addition to their controlled genetic background, MDMi are readily available  
73 and yield mature microglia in a short time frame, thus allowing for the study of mature microglia from  
74 large patient cohorts (31, 32).

75 Microglial identity is driven by the multicellular milieu and three-dimensional (3D) network of  
76 macromolecules present in the brain. Therefore, the traditional two dimensional (2D) culture  
77 conditions of microglia *in vitro* systems greatly abrogate their ability to replicate mature microglial  
78 function (33). The physiological relevance of the MDMi model can be increased by using 3D *in vitro*  
79 culture techniques and co-cultures with neuro-glial cells to incorporate the cues supporting microglial  
80 development *in vivo*. The development of a complete AD pathological cascade in 3D, but not in 2D,  
81 shows an improved *in vitro* disease modelling capacity of 3D culture systems compared to 2D (34,  
82 35). However, no 3D *in vitro* model of AD has yet incorporated patient-derived microglial cells in a  
83 highly reproducible and experimentally flexible 3D cell culture system (36).

84 In this study, we generated for the first time 3D patient-specific MDMi models from multiple living  
85 AD patients. These 3D hydrogel-based MDMi models are consistent and easy to generate and allow  
86 for the establishment of 3D MDMi co-cultures with human neuro-glial cells, which provide a more  
87 complex and physiologically relevant culture environment. We characterised 3D MDMi models at  
88 different levels. Firstly, we examined whether a 3D hydrogel scaffold enhances microglia-like features  
89 (*i.e.*, morphology and marker expression) in MDMi compared to a 2D platform using cells from  
90 healthy controls. Secondly, we demonstrated the feasibility to generate 3D MDMi models in 3D co-  
91 culture. Thirdly, we studied AD-specific changes in the 3D cultures, including morphology, expression  
92 of AD risk genes, cell-to-cell interaction with neuro-glial cells and functional responses against A $\beta$

93 aggregates. Finally, to test the potential applicability of 3D MDMi platforms in a drug screening setting,  
94 we compared drug responses in MDMi between the 2D, 3D and 3D co-culture models. Together, the  
95 utility of the 3D MDMi models presented here opens new avenues for more predictable and  
96 personalised *in vitro* microglia models to test candidate therapeutics.

## 97 **Methods**

### 98 **Study cohort**

99 This study involved the recruitment of Alzheimer's disease (AD) and Healthy control (HC)  
100 participants through the *Prospective Imaging Studying of Aging: Genes, Brain and Behaviour study*  
101 (PISA) at QIMR Berghofer Medical Research Institute, Queensland, Australia (37). All research  
102 adhered to the ethical guidelines on human research outlined by the National Health and Medical  
103 Research Council of Australia (NHMRC). Ethical approval was obtained from QIMR Berghofer  
104 Medical Research Institute. All participants provided informed consent before participating in the  
105 study. The number of samples varied in each assay due to the limited proliferative capacity of MDMi  
106 in culture, and the quantity of blood samples available from each donor. Further, repeated longitudinal  
107 sampling of peripheral blood from patients was not within the scope of this study. All samples used  
108 for assays were randomly selected, with matching age, gender and apolipoprotein E (APOE) status for  
109 each assay. APOE genotyping was performed in the Sample Processing Facility at QIMR Berghofer  
110 Medical Research Institute, Queensland, Australia, as previously described (37).

111 **Table 1. Summary of donor information.**

| Study cohorts                   |             | Healthy Control (HC) | Alzheimer's disease (AD) |
|---------------------------------|-------------|----------------------|--------------------------|
| N° of participants              |             | <i>n</i> = 12        | <i>n</i> = 13            |
| Sex of participants             | Females (%) | 58.3% (7/12)         | 53.8% (7/13)             |
|                                 | Males (%)   | 41.7% (5/12)         | 46.2% (6/13)             |
| Age of participants (mean ± SD) |             | 68.5 ± 2.7           | 69.3 ± 5.4               |
| APOE genotype                   | E3/E3 (%)   | 25% (3/12)           | 7.7% (1/13)              |
|                                 | E3/E4 (%)   | 58.3% (7/12)         | 69.2% (9/13)             |
|                                 | E4/E4 (%)   | 16.7% (2/12)         | 23.1% (3/13)             |

112 SD = standard deviation

113 APOE = apolipoprotein E

### 114 **Isolation of peripheral blood mononuclear cells (PBMCs)**

115 Peripheral venous blood samples were collected in ethylenediaminetetraacetic acid (EDTA) tubes  
116 (Becton-Dickson, NJ, USA). PBMCs separation was performed within 2 h of blood withdrawal using  
117 SepMate™ tubes (StemCell Technologies, BC, Canada) as per manufacturer's instructions. PBMCs  
118 were washed twice with PBS containing 1mM EDTA and subsequently frozen in 10% dimethyl  
119 sulphoxide (DMSO) (Merck KGaA, Hesse, Germany) and 90% foetal bovine serum (ThermoFisher  
120 Scientific, CA, USA) (v/v).

### 121 **Establishment of 2D and 3D MDMi cultures**

122 MDMi in 2D were generated as described previously (30). Briefly, cryopreserved PBMCs were  
123 thawed and seeded onto plates coated with Matrigel (Corning, NY, USA). After 24 h incubation at  
124 standard humidified culture conditions (37°C, 5% CO<sub>2</sub>), non-adherent cells were removed and a cell  
125 population enriched in monocytes remained adhered to the culture vessel. To induce MDMi  
126 differentiation, monocytes were then cultured in serum-free RPMI-1640 GlutaMAX medium (Life  
127 Technologies, Grand Island, NY, USA) supplemented with 0.1 µg/ml of interleukin (IL)-34 (IL-34)  
128 (Lonza, Basel-Stadt, Switzerland), 0.01 µg/ml of granulocyte-macrophage colony-stimulating factor  
129 (GM-CSF) (Lonza, Basel-Stadt, Switzerland) and 1% (v/v) penicillin/streptomycin (Life Technologies,  
130 Grand Island, NY, USA) for 14 days.

131 To induce MDMi differentiation in 3D, monocytes were resuspended in Matrigel diluted with ice-cold  
132 culture medium at a 1:3 ratio. Matrigel-cell mixtures were seeded in 96-well plates with medium  
133 containing 0.1 µg/ml IL-34 and 0.01 µg/ml GM-CSF. 3D MDMi were collected or used for  
134 downstream assays after an average of 35 days in culture.

### 135 **Establishment of 2D and 3D human neural progenitor cell (NPCs) cultures**

136 The human ReNcell VM immortalised neural progenitor cell line (EMD Millipore, Billerica, MA,  
137 USA) was cultured as per manufacturer's instructions, with some modifications. Briefly, cells were  
138 plated onto Matrigel-coated plates for 2D cultures or mixed with a 1:3 Matrigel dilution to initiate the  
139 3D cultures. Cells were maintained in DMEM/F12 GlutaMAX medium (Life Technologies, Grand  
140 Island, NY, USA) containing 2% (v/v) B27 supplement, 20 µg/ml epithelial growth factor (EGF)  
141 (Sigma-Aldrich, MO, USA), 20 µg/ml fibroblast growth factor 2 (FGF-2) (Lonza, Basel-Stadt,  
142 Switzerland) and 1% (v/v) penicillin/streptomycin. Both 2D and 3D cultures were spontaneously  
143 differentiated for 1, 14 or 30 days by withdrawing growth factors from the maintenance medium (ReN  
144 base medium). All cells used were in passages 7-10 to ensure consistent spontaneous neuro-glial  
145 differentiation across independent experiments.

### 146 **Establishment of 3D co-cultures (MDMi and ReNcell VM)**

147 ReNcell VM were plated in 3D as described above and cultured for 1 day in ReN base medium to  
148 induce spontaneous differentiation. Monocytes were embedded in a 1:3 Matrigel dilution and seeded  
149 with 3D ReNcell VM cultures at 1:2.5 to 1:5 monocyte to ReNcell VM ratios. 3D co-cultures were  
150 maintained in 50% (v/v) ReN base medium and MDMi culture medium for an average of 35 days.

### 151 **Immunocytochemistry**

152 Immunofluorescence staining of 2D cultures was performed as described previously (30). MDMi and  
153 ReNcell VM were cultured on 8-well chamber slides (Ibidi, DKSH, Germany) and 13-mm plastic  
154 coverslips (Sarstedt, Nümbrecht, Germany), respectively. Cells were fixed in 4% paraformaldehyde

155 (PFA) or ice-cold methanol for 15 min and then washed with PBS. Blocking was performed at RT  
156 with 5% bovine serum albumin (BSA) (Sigma-Aldrich, MO, USA) in PBS. Primary antibodies for  
157 TREM 2 (1:500; Abcam, # ab201621), P2RY12 (1:200; Alomone Labs, #APR-20), TMEM119 (1:400;  
158 Abcam, # ab185333), IBA1 (1:500; Wako, #019-19741), Nestin (1:200; Abcam, #ab22035), GFAP  
159 (1:2000; Abcam, #ab4674), GalC (1:50; Santa Cruz, #sc-518055), Doublecortin (DCX) (1:200;  
160 Abcam, ab36447) and  $\beta$ III-tubulin (TUBB3) (1:500; BioLegend, #801202) were diluted in blocking  
161 solution and incubated overnight at 4°C. Cells were then washed three times with 0.1% Triton-X 100  
162 in PBS and incubated with 1:250 Alexa Fluor 488 (#A-11034) / 594 (#A-21203) / 647 (#A-21244)  
163 secondary antibodies (ThermoFisher Scientific, CA, USA) for 2 h at RT in the dark and counterstained  
164 with a nuclear dye (Hoechst 33342, 1  $\mu$ g/ml). Immunofluorescence staining of 3D cultures was  
165 performed according to (38) with some modifications. 3D cultures, established on black optical 96-  
166 well plates (ThermoFisher Scientific, CA, USA), were fixed with 4% PFA overnight at RT and washed  
167 twice with PBS. Cultures were then permeabilised for 30 min with 0.3% Triton-X 100 in PBS, rinsed  
168 with PBS and blocked overnight at 4°C with 2% BSA (Sigma-Aldrich, MO, USA) in PBS. Primary  
169 antibody solutions were added as described above and incubated for 24 h at 4°C. Secondary antibody  
170 solutions were incubated for 5 h at RT in the dark. Following primary and secondary antibody  
171 incubations, cultures were washed five times (10 min each) with 0.1% Triton-X 100 in PBS and  
172 counterstained with Hoechst 33342. Images were captured using a confocal laser scanning microscope  
173 (LSM-780, Carl Zeiss) at 20X and 40X magnification and processed using the Zeiss ZEN software.

#### 174 **RNA extraction and quantitative real-time PCR (qRT-PCR)**

175 RNA and cDNA were prepared as previously described (39). Total RNA was extracted using a Direct-  
176 zol RNA Miniprep kit (Integrated Sciences, Australia) as per manufacturer's protocol. Conversion to  
177 cDNA was carried out using a SensiFAST™ cDNA synthesis kit (Bioline, London, UK). For qRT-  
178 PCR, cDNA was diluted 1:10 to generate working solutions and combined with SensiFAST™ SYBR®  
179 Lo-ROX master mix and gene-specific primers (see primer sequences in **Table S1**). The qRT-PCR  
180 runs were performed as triplicate on Applied Biosystems ViiA 7 (ThermoFisher Scientific, CA, USA).  
181 Endogenous control *18S* was used as a housekeeping gene for normalisation. Relative gene expression  
182 levels were calculated using the  $\Delta\Delta$ Ct method.

#### 183 **Multiplex bead-based immunoassay**

184 The LEGENDplex™ Human Inflammation (#740809) and Growth Factor (#740180) kits (BioLegend,  
185 CA, USA) were used to detect cytokines and growth factors in conditioned media from 3D MDMi and  
186 ReNcell VM mono- and co-cultures. The assay was performed as per manufacturer's instructions.  
187 Briefly, conditioned media were incubated with a cocktail of antibody-conjugated capture beads. Then



188 biotinylated detection antibodies were added followed by streptavidin-phycoerythrin (SA-PE). The  
189 amount of analytes of interest in the samples was calculated as a proportion of the fluorescent signal  
190 intensity provided by capture bead-analyte-detection antibody-SA-PE sandwiches. Signals were  
191 acquired on a BD LSRFortessa 5 (BD Biosciences, CA, USA) using FACSDiva software, and analysed  
192 using Qognit, a cloud-based LEGENDplex™ software (BioLegend, CA, USA). Concentrations (pg/ml)  
193 were normalised to total amount of protein in the cultures.

#### 194 **Morphology analysis**

195 Quantification of morphological parameters of MDMi in 2D and 3D mono-cultures was performed by  
196 adapting a previous method (40). In brief, phase contrast images acquired with a 20X objective were  
197 processed in FIJI software (National Institutes of Health, Maryland, USA) using a macro script that  
198 applied a threshold, followed by processing functions “despeckle”, “close” and “remove outliers” that  
199 generated a binary image. Binary images were then run on the *AnalyseSkeleton(2D/3D)* plugin, which  
200 resulted in skeletonised images. The “results and branch information” outputs from the plugin  
201 contained data on branch length, endpoint number and triple and quadruple junctions number. Binary  
202 images were also analysed using the *Analyze particles* function in FIJI. This calculated the “solidity”  
203 or “ramification index” value, which results from dividing the area of MDMi by its convex area (*i.e.*,  
204 area of the smallest polygon drawn around the cell). More ramified cells have a bigger convex area  
205 and thus a smaller ramification index (<1). Mean single cell values for each parameter were calculated.  
206 The total number of MDMi analysed per donor was 100 in 2D and 20 in 3D.

#### 207 **Cell contacts analysis in 3D co-cultures**

208 Confocal Z-stack images of 3D co-cultures acquired with a 20X objective were rendered in 3D using  
209 the Imaris software (Bitplane, Belfast, UK). During image acquisition, the Z-interval was set at  
210 “Optimal” so that the number of acquired slices was suitable for the given stack size, objective lens,  
211 and pinhole diameter. Following surface modelling using the Surface function in Imaris, the *Surface-*  
212 *Surface contact area* extension module was applied to measure the areas in contact between ReNcell  
213 VM and MDMi as well as the number of contacts established. Both parameters were then normalised  
214 to the total number of MDMi in the image. A total of 200 MDMi in co-culture were analysed for each  
215 donor in the HC and AD cohorts.

#### 216 **Preparation of amyloid- $\beta$ (A $\beta$ ) fibrils**

217 Fluorescein isothiocyanate (FITC)-conjugated amyloid- $\beta$  peptides 1-42 (FITC-A $\beta$ <sub>1-42</sub>) (Bachem,  
218 M2585, CH) were dissolved in DMSO to a concentration of 500 $\mu$ M and stored at -80°C. FITC-A $\beta$ <sub>1-42</sub>  
219 were incubated for 24 h at 37°C in the 3D cultures prior to imaging to allow for the fibrillisation of the  
220 peptides and formation of A $\beta$  fibrillary aggregates.



221 **A $\beta$  aggregates exposure and surveillance analysis**

222 FITC-A $\beta$ <sub>1-42</sub> were added at 5 $\mu$ M to MDMi 3D mono- and co-cultures at day 35 of differentiation. After  
223 24 h, cultures were imaged on an EVOS FL Auto 2 (ThermoFisher Scientific, CA, USA). Scans were  
224 set to image multiple z-stack planes every 12 h for 7 days using a 10X objective. At least 3 fields of  
225 view were scanned per well. MDMi located within an area of 90,000  $\mu$ m<sup>2</sup> containing one or more A $\beta$   
226 fibrillary aggregate were tracked using the *Manual tracking* plugin in FIJI. Migrated distance and  
227 velocity of tracked cells were calculated and normalised to the number of MDMi in the analysed areas.  
228 Between 100-200 MDMi per individual was tracked in both HC and AD cohorts.

229 **Statistical analysis**

230 All statistical analyses were performed using GraphPad Prism software version 8 (Graphpad Software,  
231 CA, USA). Comparisons between two groups were analysed with two-tailed Student's *t*-test or Mann-  
232 Whitney *U*, when normality assumptions were not met. Comparisons between three or more groups  
233 were analysed by one- or two-way analysis of variance (ANOVA) followed by post-hoc tests. Data  
234 are presented as mean  $\pm$  SEM or mean  $\pm$  SD and  $P \leq 0.05$  was considered significant. Statistical  
235 significance was determined as \* $P < 0.05$ , \*\* $P < 0.01$ , \*\*\* $P < 0.001$ , \*\*\*\* $P < 0.0001$ , as detailed in  
236 figure legends.

237 **Results**

238 **MDMi in 3D show increased survival and more mature microglial features compared to 2D**

239 We have previously differentiated monocytes into MDMi in a 2D platform using Matrigel-coated  
240 plates (30). To develop a more physiologically relevant MDMi model with a better representation of  
241 the 3D structure of the brain, we differentiated monocytes into MDMi in a 3D platform. We embedded  
242 the monocytes in Matrigel (**Fig. 1A; Fig. S1A**), resulting in cultures with 6.2-fold higher cell thickness  
243 (*i.e.*, size of the Z-stack that captured the whole cell) compared to 2D (**Fig. 1B; Fig. S1B; Movie S1,**  
244 **2**). Remarkably, MDMi survival in 3D was significantly increased by 2.5 fold compared to 2D (**Fig.**  
245 **1C**). Hence, MDMi were cultured for an average of 14 days in 2D and 35 days in 3D, after which  
246 features of cellular ageing, including enlarged cell sizes and increased vacuolisation, were observed.

247 We next examined if the 3D culture conditions affected microglial features in MDMi, including  
248 morphology and expression of microglia-enriched markers, compared to 2D. Overall, we observed  
249 that 3D MDMi showed a highly ramified branched structure and increased branch complexity  
250 compared to 2D (**Fig. 1D**). Branched structure parameters, such as branch length and number of  
251 branches (endpoints), and branch complexity parameters, such as number of triple and quadruple  
252 junctions (points at which branches divide into three or four sub-branches, respectively), were  
253 significantly increased in 3D compared to 2D MDMi (**Fig. 1E-G**). Ramified microglia have a highly  
254 branched morphology with a larger convex area than amoeboid cells, thus correlating with a low  
255 ramification index (41). We observed that the ramification index of 3D MDMi was lower than 2D  
256 MDMi (**Fig. 1H**), confirming an enhanced ramified morphology of MDMi in the 3D platform. Such  
257 enhancement in MDMi ramified morphology could be likely due to the larger surface area for growth  
258 and differentiation provided by the 3D Matrigel scaffold.

259 We have previously reported that MDMi cultured in 2D showed a microglial phenotype compared to  
260 monocytes demonstrated by the upregulated expression of microglia-enriched markers, including  
261 *PROS1*, *GPR34*, *GAS6* and *TREM2*, and the downregulated expression of the leukocyte marker *CD45*  
262 (30). Expectedly, all seminal microglial markers (*IBAI*, *PROS1*, *GPR34*, *TMEM119*, *GAS6* and  
263 *TREM2*) were upregulated and *CD45* was downregulated in 3D MDMi compared to monocytes (**Fig.**  
264 **1I**). Interestingly, in comparison to 2D, we observed a significantly increased expression of *PROS1*,  
265 *GPR34* and *TMEM119* in 3D MDMi, while similar expression levels were observed for *IBAI*, *GAS6*  
266 and *TREM2* between 3D MDMi and 2D MDMi (**Fig. 1I**). These results suggest that the 3D culture  
267 was able to promote selective microglia-enriched markers in MDMi. Importantly, as immature  
268 microglia have been reported to lack *TMEM119* expression (42), the upregulation of *TMEM119* in 3D  
269 MDMi compared to 2D MDMi further indicates an enhanced microglial maturity in the 3D platform.

270 Finally, positive immunostaining of Trem2 and P2ry12 proteins in 3D MDMi confirmed the retention  
271 of microglial proteins in MDMi for up to 35 days (**Fig. S1C**).

272 Overall, these results demonstrate that MDMi cultured in 3D survive longer in culture and better  
273 recapitulate microglial features, including a more ramified morphology and enhanced expression of  
274 microglial core genes, compared to 2D.

### 275 **Human neural progenitor cells differentiated in 3D generate more mature neuro-glial** 276 **populations compared to 2D**

277 To mimic the neuro-glial cues present in the brain microenvironment, we used the immortalised human  
278 neural progenitor cell (NPC) line ReNcell VM to establish a co-culture platform with MDMi. ReNcell  
279 VM are derived from the ventral mesencephalon region of a foetal brain (43) and give rise to mixed  
280 populations of astrocytes, oligodendrocytes and neurons upon differentiation (43, 44). Using  
281 immunofluorescence, we confirmed the presence of cells expressing nestin (NPC marker), GFAP  
282 (immature and mature astrocyte marker), GalC (oligodendrocyte progenitor cells (OPCs) and mature  
283 oligodendrocyte marker) and doublecortin (DCX, immature neuron marker) after 1 and 30 days of  
284 ReNcell VM differentiation in 2D (**Fig. 2A**). As ReNcell VM differentiate, they lose their stemness  
285 and proliferative capacity. This was confirmed by a significant decrease in *Ki67* expression, a  
286 proliferation marker, by day 14 of differentiation that was further decreased by day 30 of  
287 differentiation (**Fig. 2B**). Consistently, the reduction of stemness was reflected by the decreased  
288 expression of well-known markers of radial glial progenitor cells (*SOX2*, *NESTIN*, *GLAST* and *BLBP*)  
289 by day 30. In contrast, immature astrocyte, OPCs and neuron markers (*GFAP*, *PLP-1* and *TBR2*,  
290 respectively) showed increased expression trends after day 1 of differentiation. Markers indicating  
291 enhanced astrocytic (*GLT-1*), oligodendrocytic (*GalC*) and neuronal (*MAPT*, *synaptophysin (SYP)*)  
292 maturity showed a similar upregulation by day 30 but reached lower expression levels than those from  
293 radial glia and immature glial markers (**Fig. 2C**). Overall, these results demonstrate that differentiation  
294 of ReNcell VM generates mixed neuro-glial cell populations with predominance of glial cell types  
295 including radial glial progenitor cells, astrocytes and OPCs.

296 We next examined whether differentiation under 3D Matrigel culture conditions would enhance the  
297 maturity of ReNcell VM-derived neuro-glial cell populations compared to 2D. Hence, we  
298 differentiated ReNcell VM in 2D and 3D for 1 day (**Fig. 2D**). We observed that 3D ReNcell VM  
299 showed a significant reduction of *Ki67* expression and a significant increase of mature astrocyte and  
300 neuron marker (*GLT-1* and *SYP*, respectively) expression compared to 2D (**Fig. 2E-F**). These results  
301 indicate that the 3D platform enhances the maturation of the astrocytic and neuronal populations in  
302 ReNcell VM within 1 day of differentiation compared to 2D.

303 Together, ReNcell VM-derived neuro-glial populations provide a multicellular brain-like environment  
304 that allows for the generation of co-cultures with MDMi, which represent more complex and  
305 physiologically relevant MDMi models.

### 306 **MDMi co-cultured in 3D with human neural progenitor cells elicit an inflammatory response to** 307 **aggregated amyloid- $\beta$ (A $\beta$ )**

308 We next generated co-cultures of MDMi and ReNcell VM. Monocytes, pre-mixed with Matrigel, were  
309 added to 3D ReNcell VM differentiated for 1 day. Both cell types were then left to differentiate  
310 together for 35 days, resulting in a mixed 3D co-culture containing MDMi and ReNcell VM-derived  
311 radial glial progenitor cells, neurons, astrocytes and OPCs (**Fig. 2G**). Interestingly, we observed that  
312 in 3D co-culture, monocytes readily differentiated into MDMi with a microglia-like morphology (**Fig.**  
313 **2H**). This is in contrast to 2D co-culture, where monocytes retained their round morphology (**Fig. S2**).  
314 This indicates that the 3D platform is able to provide culture conditions suitable for co-culturing MDMi  
315 and ReNcell VM, likely due to the support of the 3D Matrigel scaffold.

316 A $\beta$  aggregation is a major histopathological hallmark of AD brains. Hence, we incorporated FITC-A $\beta$   
317 peptides into the 3D co-cultures. Remarkably, we observed that FITC-A $\beta$  peptides readily formed  
318 substantial aggregates within 24 h of incubation in 3D (**Fig. 2I; Fig. S3**) as opposed to 2D, where  
319 FITC-A $\beta$  remained in peptides (**Fig. S3**). This suggests that 3D culture conditions may increase A $\beta$   
320 aggregation (**Fig. S3**), which is consistent with previous reports showing an accelerated A $\beta$   
321 accumulation in 3D hydrogel-based cultures due to limited diffusion of the A $\beta$  peptides (34, 38, 45).  
322 High A $\beta$  plaque load has been shown to induce pro-inflammatory responses in microglia from  
323 transgenic AD mouse models (46, 47). Hence, we next investigated whether MDMi are functional in  
324 3D co-culture and respond to FITC-A $\beta$  aggregates. We used a multiplex immunoassay to measure  
325 cytokines released in the conditioned medium of FITC-A $\beta$ -treated 3D co-cultures, and 3D mono-  
326 cultures of ReNcell VM and MDMi. We observed a significantly upregulated secretion of classical  
327 pro-inflammatory cytokines IL-1 $\beta$  (2.8 fold) and IL-18 (2.3 fold), and similar trends for IL-6, in 3D  
328 co-cultures treated with FITC-A $\beta$  compared to untreated conditions (**Fig. 2J**). Secretion of other pro-  
329 inflammatory cytokines, including IL-8, IFN- $\alpha$ 2, MCP-1, IFN- $\gamma$  and IL-10 was also stimulated by  
330 FITC-A $\beta$  (**Fig. S4**). These inflammatory responses to A $\beta$  were largely mediated by MDMi in the 3D  
331 co-cultures, as observed by significant changes in cytokine secretion following treatment in 3D MDMi  
332 mono-cultures, while 3D ReNcell VM mono-cultures remained unchanged (**Fig. 2J, S4**).

333 Overall, these results indicate that MDMi elicit a broad inflammatory response in the 3D platforms  
334 and demonstrate the functional capability of the 3D MDMi culture systems to model  
335 neuroinflammation in AD.

### 336 **Disease-specific differences in 2D and 3D mono-cultures of AD patient-derived MDMi**

337 We next generated 2D and 3D MDMi mono-cultures from healthy control (HC) individuals and AD  
338 patients selected based on matched sex, age and APOE genotype (**Table 1**). Monocytes from HC and  
339 AD individuals were successfully differentiated into MDMi using 2D and 3D platforms (**Fig. 3A**).  
340 Survival of both HC and AD MDMi was significantly increased in 3D compared to 2D by 2.6 and 2.4  
341 fold, respectively, while no differences in survival between HC and AD MDMi were observed in  
342 neither of the platforms (**Fig. 3B**).

343 To determine if 2D and 3D AD MDMi mono-cultures recapitulate disease-specific differences, we  
344 examined phenotypic features (morphology and expression of AD risk genes) associated with AD  
345 brain microglia in human and mouse models and compared them 1) between HC and AD cohorts and  
346 2) between culture platforms. Quantification of morphological parameters (**Fig. S5**) revealed that when  
347 MDMi are cultured in 2D or 3D, HC and AD MDMi have similar branch length, number of branches  
348 (endpoints), number of triple and quadruple junctions, and ramification index (**Fig. 3C-G**). This  
349 suggests that HC and AD MDMi exhibit a similar branch structure and complexity in both 2D and 3D  
350 platforms.

351 We then assessed if those morphology parameters vary between culture platforms within the HC and  
352 AD cohorts. Comparison of branched structure parameters (branch length and number) between 2D  
353 and 3D MDMi showed similar trends in HC and AD, including similar branch length and increased  
354 number of branches in 3D compared to 2D (**Fig. 3C, D**). Interestingly, this contrasted with branch  
355 length in a young HC cohort (20-40 years of age) of MDMi (**Fig. 1E**), where MDMi exhibited longer  
356 branches in 3D compared to 2D. This may be explained by an age-related effect, where MDMi from  
357 elderly donors (60-80 years of age) have impaired response to branching signals and long-term culture  
358 in a 3D Matrigel scaffold. Further studies should confirm this observation.

359 Comparison of branch complexity parameters (triple and quadruple junctions) between 2D and 3D  
360 MDMi showed a similar trend in number of triple junctions but differed in number of quadruple  
361 junctions between the HC and AD cohorts. While the number of triple junctions increased in 3D  
362 compared to 2D MDMi in both HC and AD (**Fig. 3E**), the number of quadruple junctions increased in  
363 3D compared to 2D MDMi in HC but remained unchanged in AD (**Fig. 3F**). Comparison of  
364 ramification index showed a significant decrease in 3D compared to 2D MDMi in both HC and AD  
365 cohorts, confirming a more ramified morphology in 3D MDMi (**Fig. 3G**). Overall, our results show  
366 that the 3D platform is able to enhance branch number, ramified morphology and complexity  
367 parameters in MDMi from HC individuals compared to 2D. However, the 3D platform induced an  
368 increase in branch number and ramified morphology but was not able to enhance all complexity  
369 parameters in MDMi from AD patients compared to 2D.

370 A recent study done in mouse models has suggested that AD risk genes present in microglia  
371 functionally influence microglial behaviour (15). In keeping with this, we examined 1) if risk genes  
372 are present/enriched in AD compared to HC MDMi, and 2) if these risk genes are differentially  
373 expressed in AD MDMi when cultured in 3D compared to 2D mono-cultures. A panel of AD risk  
374 genes including *CLU*, *TREM2*, *PLCG2* and *PILRB* was examined by qRT-PCR. Fold change of  
375 expression in 3D compared to 2D revealed heterogeneous distributions within the HC and AD cohorts,  
376 with 3D MDMi showing increased trends of enhanced expression within AD patients than HC  
377 individuals for most risk genes (*CLU*, *PLCG2* and *PILRB*) (**Fig. 3H, I**). Interestingly, *PILRB*  
378 expression was significantly upregulated in 3D AD MDMi compared to 3D HC MDMi (**Fig. 3J**), while  
379 no significant differences were observed for the other genes (**Fig. S6**). These results demonstrate that  
380 the 3D platform is able to enhance the expression of microglia-specific AD risk genes in AD MDMi  
381 compared to 2D and reflects the heterogeneity of disease phenotypes within AD patients.

### 382 **Disease-specific differences in 3D co-cultures of AD patient-derived MDMi**

383 We next characterised MDMi from HC individuals and AD patients in the 3D co-culture platform (**Fig.**  
384 **4A**). As observed in 3D MDMi mono-cultures, survival of MDMi in 3D co-culture was extended by  
385 2.5 fold compared to 2D MDMi mono-cultures and was similar to 3D MDMi mono-cultures in both  
386 HC and AD cohorts (**Fig. 4B**). The increased survival of MDMi in 3D co-culture indicates that ReNcell  
387 VM do not affect MDMi viability. Consistently, similar expression of the apoptosis marker *BAX*  
388 between HC and AD 3D co-cultures (**Fig. 4C**) suggests that the cell ratio of MDMi and ReNcell VM  
389 and the duration of the co-culture were favourable.

390 To investigate whether AD MDMi reflect disease-specific differences compared to HC MDMi in 3D  
391 co-culture, we analysed microglial behaviours known to be altered in AD brains, including 1) cell-to-  
392 cell interaction with neuro-glial cells, 2) secretion of growth factors and cytokines, and 3) migratory  
393 and inflammatory responses to A $\beta$  aggregates. The marked synapse loss in AD is predominantly  
394 mediated by microglia through aberrant synapse engulfment (6). Hence, we first examined if the cell-  
395 to-cell interactions between AD MDMi and ReNcell VM show differences compared to HC MDMi in  
396 the 3D co-cultures. We performed a 3D rendering and subsequent surface reconstruction of  
397 immunofluorescent 3D co-culture images using the Imaris software (**Fig. 4D**). The ‘*surface-surface*  
398 *contact area*’ extension was used to quantify the area of contact between MDMi (labelled with Iba1)  
399 and ReNcell VM (labelled with the astrocyte- and neuron-specific markers GFAP and  $\beta$ III-tubulin  
400 (TUBB3), respectively) and the number of contact points established between both cell types.  
401 Interestingly, we observed a significantly smaller area of contact and a reduced number of contact  
402 points between MDMi and ReNcell VM in AD compared to HC 3D co-cultures (**Fig. 4E, F**). This



403 suggests an impairment in the cell-to-cell interactions between MDMi and ReNcell VM in AD 3D co-  
404 cultures that might have implications in disease.

405 In the context of AD, microglia secrete factors that alter neuron and astrocyte homeostasis, thereby  
406 contributing to disease pathogenesis (48). Hence, we next compared the secretory profiles of HC and  
407 AD MDMi in 3D co-cultures using a multiplex immunoassay in conditioned medium collected after  
408 35 days of co-culture. Overall, we observed that AD MDMi in 3D co-culture secreted higher levels of  
409 platelet-derived growth factor AA (PDGF-AA) and erythropoietin (EPO) and lower levels of  
410 interferon- $\gamma$  (IFN- $\gamma$ ) compared to HC MDMi in 3D co-culture (**Fig. 4G-I**). This indicates that AD  
411 MDMi exhibit an altered secretory activity in the 3D co-culture. Additionally, when comparing the  
412 secretion to 3D MDMi mono-cultures, we observed a significant upregulation of PDGF-AA, EPO (**Fig.**  
413 **4G, H**) and other neurotrophic factors such as Angiopoietin 2 and the granulocyte-macrophage colony  
414 stimulating factor (GM-CSF) (**Fig. 4J, K**) in 3D co-cultures from both HC and AD cohorts. Secretion  
415 of these factors by 3D ReNcell VM mono-cultures was higher for PDGF-AA and EPO and lower for  
416 IFN- $\gamma$ , Angiopoietin 2 and GM-CSF when compared to 3D MDMi mono-cultures (dotted lines in **Fig.**  
417 **4G-K**). This suggests that the interaction between MDMi and ReNcell VM in the 3D co-cultures has  
418 a functional impact on either cell type. Overall, these results suggest that the 3D co-culture platform  
419 provides a suitable environment for AD MDMi to display functional impairments.

420 Microglia in the vicinity of A $\beta$  plaques have been shown to exhibit altered proliferation, migration,  
421 clustering around A $\beta$  aggregates and A $\beta$  uptake in a mouse model of AD (49). Hence, in order to study  
422 MDMi behaviours in the presence of A $\beta$  depositions, we added FITC-A $\beta$  into 3D co-cultures from HC  
423 individuals and AD patients and live imaged for 7 days (**Fig. 4L; Movie S3**). We observed that AD  
424 MDMi surveyed longer distances and at a higher velocity around A $\beta$  aggregates compared to HC  
425 MDMi, with no significant changes in the proportion of MDMi that clustered around the A $\beta$  aggregates  
426 (**Fig. 4M-O**). Interestingly, measurement of inflammatory cytokine secretion using multiplex  
427 immunoassay revealed disease-specific differences between HC and AD MDMi in 3D co-cultures  
428 treated with FITC-A $\beta$ . When A $\beta$  was present in the cultures, IL-6 secretion was significantly decreased  
429 in AD compared to HC 3D co-cultures, while increasing trends were observed for IL-1 $\beta$ , IL-18 (**Fig.**  
430 **4P**) and other pro-inflammatory cytokines such as TNF- $\alpha$  and IL-10 (**Fig. S7**). Such differences were  
431 not observed under untreated conditions. Together, these results indicate that AD MDMi respond  
432 differently to AD-related stressors compared to HC MDMi when modelled in the 3D co-culture  
433 platform.

434 **Drug treatment induces differential cytokine gene expression in MDMi cultured in 2D and 3D**



435 Cytokines are key secreted molecules used by microglia to execute inflammatory and neuromodulatory  
436 functions. Moreover, altered cytokine levels have been reported in AD brains and may have important  
437 roles in disease pathogenesis (50). To investigate cytokine expression profiles in MDMi we analysed  
438 a panel of inflammatory cytokines (*IL-6*, *TNF- $\alpha$* , *IL-8*, *TGF- $\beta$* , *IL-10*, *IL-1 $\beta$*  and *IL-18*) by qRT-PCR.  
439 We then examined for potential differences 1) between culture platforms and 2) between HC and AD  
440 cohorts. When comparing cytokine expression levels between platforms in the HC cohort, no  
441 significant differences were observed for any of the cytokines (**Fig. 5A**). However, in the AD cohort,  
442 *IL-8* was significantly downregulated in 3D co-culture compared to 3D MDMi mono-culture, and  
443 *TGF- $\beta$*  and *IL-18* were significantly downregulated in 3D co-culture compared to 2D MDMi (**Fig. 5B**).  
444 When comparing between HC and AD MDMi in either platform, we observed a significantly  
445 decreased expression of *TNF- $\alpha$*  in AD MDMi compared to HC only in the 3D MDMi platform (**Fig.**  
446 **S8A**). No disease-specific differences were observed for the rest of cytokines (**Fig. S8B-G**). Together,  
447 these results demonstrate cytokine changes dependent on platform, which were more evident in MDMi  
448 from AD patients than HC individuals.

449 Based on the differences in baseline cytokine expression between platforms, we next investigated  
450 whether drug treatment alters such platform-dependent responses in the HC and AD cohorts. For this,  
451 we trialled two FDA-approved compounds, dasatinib and spiperone, which have anti-cancer and anti-  
452 psychotic properties, respectively. Additionally, these drugs have been shown to mitigate  
453 inflammation in *in vitro* models of microglia (51, 52) and murine models of AD (53) and have  
454 potential as re-purposed drugs for treating neuroinflammation. Dasatinib-treated MDMi from HC  
455 individuals showed a significantly reduced expression of *IL-6* in 3D compared to 2D MDMi, while  
456 expression levels for the rest of cytokines remained unchanged between platforms (**Fig. 5C**).  
457 Dasatinib-treated MDMi from AD patients showed a significantly increased expression of *IL-8*, *TGF- $\beta$*   
458 and *IL-1 $\beta$*  in 3D compared to 2D MDMi. Similarly, *IL-8* was upregulated in 3D co-cultures compared  
459 to 2D MDMi (**Fig. 5D**). Spiperone-treated MDMi showed similar cytokine expression levels in all  
460 platforms in the HC cohort (**Fig. S9A**) and a significant downregulation of *TNF- $\alpha$*  in 3D AD co-  
461 cultures compared to 3D AD MDMi mono-cultures (**Fig. S9B**). When compared to untreated  
462 conditions, dasatinib induced significant changes (*i.e.*, downregulation of *TGF- $\beta$*  and *IL-1 $\beta$*  in HC and  
463 AD MDMi, respectively) only in the 2D platform (**Fig. 5C, D**), while spiperone did not significantly  
464 alter cytokine expression in any platform (**Fig. S9A, B**).

465 Interindividual variability in drug responses was displayed using heatmaps, which show cytokine  
466 expression levels in 2D and 3D MDMi from each individual in the HC and AD cohorts (**Fig. 5E, F**;  
467 **Fig. S9C, D**). When comparing within HC individuals or AD patients, cytokine expression in MDMi  
468 showed high heterogeneity in both 2D and 3D platforms. For example, in the dasatinib-treated HC

469 MDMi cohort, *IL-10* was highly expressed in 2D MDMi from individuals 1 and 3 compared to  
470 individuals 4 and 5 (**Fig. 5E**). In the dasatinib-treated AD MDMi cohort, *IL-10* was highly expressed  
471 in 2D MDMi from patients 2, 3, 6 and 7 compared to patients 4 and 8 (**Fig. 5F**). When considering  
472 dasatinib-treated 3D MDMi, *IL-8* showed highly variable expression in HC and AD, with individual  
473 4 and patient 3 showing a notably upregulated gene expression compared to the rest of patients (**Fig.**  
474 **5E, F**). Importantly, differences between dasatinib-treated 2D and 3D MDMi in each particular HC or  
475 AD individual were also demonstrated in the heatmaps. Some examples include divergent expression  
476 levels of *IL-8* in HC individual 4, *IL-10* in HC individual 1 (**Fig. 5E**), *IL-8* in AD patient 3 and *IL-10*  
477 in AD patients 2 and 3 (**Fig. 5F**). Similar trends in the heterogeneity of drug responses within and  
478 between 2D and 3D MDMi were observed for spiperone-treated MDMi (**Fig. S9C, D**).  
479 Overall, these results suggest that drug treatment induces differential cytokine expression in MDMi  
480 from both HC individuals and AD patients in a culture platform-dependent manner.

481 **Discussion**

482 Research involving human microglia is hampered by the lack of model systems that faithfully  
483 recapitulate their dynamic characteristics *in vivo*, particularly those associated with disease.  
484 Generating more representative microglia model systems will address this shortcoming and help  
485 elucidate microglia-mediated disease mechanisms, expediting pre-clinical investigations of microglia-  
486 targeted therapeutics and better clinical outcomes (54).

487 Recreating physiologically relevant culture conditions to mimic the interaction of microglia with other  
488 brain cell types and the extracellular matrix is crucial for accurately modelling the role of microglia in  
489 disease. To date, no study has attempted to culture human microglia that have not been genetically  
490 modified in a 3D system resembling human brain tissue. In an effort to develop more representative  
491 *in vitro* models of human microglia, we used MDMi, a model system of microglia-like cells that has  
492 emerged as a promising, patient-specific drug screening platform for neurological diseases (55, 56).  
493 Previous reports have shown that MDMi morphologically and functionally resemble brain-resident  
494 human microglia and express bonafide microglial markers (28-31). In this study, we developed novel  
495 MDMi platforms that incorporate relevant *in vivo* cues resembling the microenvironment of the brain.  
496 This was achieved by utilising a hydrogel-based 3D model to culture MDMi in microenvironments of  
497 increasing complexity and physiological relevance, firstly as 3D MDMi mono-cultures and secondly  
498 as 3D co-cultures of MDMi with neural progenitor cells.

499 Our study showed that a 3D hydrogel-based culture enhances MDMi survival, the extent and  
500 complexity of ramification (branching) and the expression of mature microglial markers (*i.e.*,  
501 *TMEM119*) compared to standard 2D culture conditions. In addition, we have demonstrated the  
502 feasibility of culturing MDMi together with neuro-glial cells derived from human immortalised neural  
503 progenitor cells (*i.e.*, ReNcell VM) in a 3D co-culture setting. Our findings also confirmed that MDMi  
504 are capable of producing broad inflammatory responses upon exposure to inflammatory stimuli, which  
505 is preserved in both 3D mono- and co-culture models.

506 We observed an enhanced maturation of microglial and neuro-glial cells in both our MDMi and  
507 ReNcell VM 3D mono-cultures compared to 2D, in keeping with previous studies that used similar  
508 3D cell models of primary rodent microglia and astrocytes (57, 58) and human induced neural stem  
509 cell lines (59, 60). The enhanced maturation of microglia-like features in 3D MDMi could be attributed  
510 to their increased survival in culture. Our model therefore shows two major advantages. Firstly, it  
511 better mimics *in vivo* growth conditions. Secondly, it provides a longer time frame for differentiation  
512 of monocytes into more mature MDMi that more closely represent brain microglia. Future studies

513 should examine whether MDMi in 3D co-culture develop an enhanced maturation of microglia-like  
514 features compared to MDMi in 2D and 3D mono-cultures.

515 Microglia are involved in the pathogenesis of AD and contribute to the clinical heterogeneity observed  
516 among patients. Hence, 3D MDMi models offer a great opportunity to study AD microglia in a patient-  
517 specific manner. To investigate the capability of MDMi to model phenotypical features of AD  
518 microglia in the 2D and 3D mono-culture and co-culture platforms, we generated MDMi cultures using  
519 monocytes from living AD patients, a major advantage of our 3D AD MDMi platform. Unlike murine  
520 or human immortalised microglia cell lines used in previous studies (45, 61), MDMi are patient-  
521 derived and have not been genetically modified, being therefore more physiologically relevant and  
522 clinically applicable. In addition, the use of cell samples obtained from living patients allows for  
523 longitudinal modelling of disease progression in AD, a prerequisite for targeted treatment at various  
524 stages of the disease.

525 We first compared cellular aspects in our 2D and 3D MDMi mono-culture models that have been  
526 reported to be altered in microglia isolated from post-mortem AD patient brains. Analysis of the MDMi  
527 branched morphology revealed similarities between HC and AD MDMi in both the 2D and the 3D  
528 mono-culture models. These similarities most likely reflect age-related phenotypes described in human  
529 AD microglia rather than activated phenotypes observed in microglia from AD mouse models. Indeed,  
530 this age-related phenotype, termed HAM (human Alzheimer's microglia) was originally described in  
531 myeloid cell populations isolated from human AD post-mortem brain samples at later stages of disease  
532 (11). The HAM profile showed substantial overlap of age-associated gene expression patterns between  
533 AD and control samples. Therefore, HC and AD MDMi are likely to have similar morphologies  
534 irrespective of the culture platform. Our 3D platform revealed a failure of AD MDMi to fully increase  
535 morphological complexity, particularly in relation to the number of quadruple junctions (points  
536 connecting four sub-branches), compared to 2D. However, all complexity parameters, including  
537 number of triple (points connecting three sub-branches) and quadruple junctions, were enhanced in 3D  
538 HC MDMi compared to 2D. This potentially suggests that AD MDMi have an altered branching  
539 complexity, only evident when culturing in a 3D platform. Microglial branches are highly dynamic  
540 and constantly survey the brain microenvironment, phagocytosing dysfunctional synapses and  
541 releasing trophic factors that support neural connectivity (62). Prior studies have identified a reduced  
542 number of junctions in human AD microglial branches (63) and less AD microglial arborisation area  
543 compared to age-matched HC (64). Our findings highlight that despite longer differentiation time in a  
544 brain-like 3D structural environment, AD MDMi in 3D are not able to fully increase the outgrowth of  
545 sub-branches in the same way as HC MDMi.

546 Gene expression of microglial AD risk genes, including *CLU*, *TREM2*, *PLCG2* and *PILRB*, in AD  
547 MDMi, revealed an overall increased expression of AD risk genes in 3D compared to 2D mono-  
548 cultures. However, there was prominent person-to-person variation in the expression level of the above  
549 genes within both HC and AD cohorts, which reflects clinical heterogeneity observed in patients.  
550 Importantly, *PILRB* (an activating immune receptor) was significantly upregulated in AD MDMi 3D  
551 mono-cultures compared to HC, which suggests that the 3D MDMi model provides a suitable  
552 screening platform with improved clinical translation to identify other AD risk genes and microglia-  
553 targeted therapeutics.

554 To assess the fidelity of AD MDMi in recapitulating disease-specific alterations in 3D co-cultures, we  
555 evaluated aspects such as the interaction of MDMi with neuro-glial cells, their secretory profiles and  
556 migration around A $\beta$  aggregates. As previously described, microglia establish physical contacts with  
557 neurons through identified molecular mechanisms (65). Our results showed reduced physical contacts  
558 between AD MDMi and ReNcell VM-derived neuro-glial cells compared to HC. Alterations in such  
559 microglia-neuron interactions could impact the microglial capacity to respond to neuronal damage,  
560 providing a potential mechanism underlying neuron degeneration in AD.

561 Microglia in AD and ageing have dysfunctional secretomes (66). We observed altered secretion  
562 patterns of PDGF-AA, EPO and IFN- $\gamma$  in AD 3D co-cultures when compared to HC, in agreement  
563 with previous observations in AD patients. An unbalanced distribution of PDGF-AA immunopositive  
564 cells has been linked to gliosis in AD post-mortem brains (67). Moreover, protein expression levels of  
565 EPO receptors in astrocytes have been found to be altered in post-mortem hippocampal brain sections  
566 from AD patients (68). Likewise, plasma levels of IFN- $\gamma$  have been shown to fluctuate according to  
567 disease severity in AD patients (69) and studies in mice have demonstrated that IFN- $\gamma$  impacts  
568 neurogenesis and synaptic plasticity (70). Taken together, our findings suggest that MDMi in 3D co-  
569 culture recapitulate alterations reported in AD patients and are therefore an exciting new platform for  
570 disease modelling.

571 Microglia have a canonical role in the removal of A $\beta$  aggregates (71). In order to validate the functional  
572 response of MDMi to A $\beta$  aggregates, we investigated the behaviour of these cells in 3D co-culture in  
573 the presence of A $\beta$  aggregates. Our results showed that AD MDMi migrate longer distances at a faster  
574 speed compared to HC. Similarly, elevated migration rates were observed in human immortalised  
575 microglia cultured in a 3D tri-culture model with ReNcell VM overexpressing pathogenic A $\beta$  species  
576 (45). However, an AD mouse model with aberrant A $\beta$  production showed decreased microglial  
577 migration towards A $\beta$  plaques (72), highlighting important differences between human and murine  
578 microglia responses to A $\beta$ . Our findings warrant further investigation of microglial motility as a

579 potentially dysregulated cellular feature in AD brains. Whether an increase in surveillance and speed  
580 of AD MDMi correlates with an impaired branched complexity in these cells remains to be elucidated  
581 in future studies.

582 Interestingly, we did not observe differences in the number of MDMi that clustered around A $\beta$   
583 aggregates. However, we observed changes in pro-inflammatory cytokine secretion in MDMi from  
584 AD compared to HC. Altogether, this suggests that AD MDMi may have unique disease-specific  
585 chemotactic and secretory responses against A $\beta$ . Future studies should investigate how such changes  
586 in MDMi impact the phagocytic clearance of A $\beta$  aggregates in the 3D co-cultures. Overall, disease-  
587 specific differences exhibited by AD MDMi in the 3D co-culture platform confirm the possibility to  
588 model disease in AD patient-specific MDMi using culture platforms that better recapitulate the brain  
589 microenvironment.

590 Preliminary drug testing demonstrated the utility of the 3D MDMi models as personalised drug  
591 screening tools. The main reasons are as follows. First, differences in MDMi drug responses between  
592 2D and 3D culture conditions reflect the functional impact of MDMi cultured in a more biologically  
593 relevant 3D environment. This is in agreement with a previous study carried out on tumour cell lines,  
594 which described varied treatment outcomes relating to cell proliferation depending on the culture  
595 system (73). Moreover, another study reported more similarities in drug-induced cellular responses  
596 between 3D cultures and *in vivo* conditions than compared to 2D cultures (74). Future investigations  
597 should determine whether drug responses from our 3D MDMi models correlate better with responses  
598 identified in animal models and clinical data from patients. Second, patient heterogeneity in MDMi  
599 drug responses was evident, supporting the translatability of our 3D platforms to measure individual  
600 patient responses in the clinic and further validating our *in vitro* systems as promising alternative  
601 platforms for personalised drug screening.

602 To further enhance our 3D MDMi model systems, microfluidic technology that accounts for the  
603 dynamic interstitial fluid flow within the brain could be used (75). Moreover, the addition of patient  
604 hiPSC-derived neural progenitor cells into the 3D MDMi co-cultures would make this platform more  
605 personalised and likely a more accurate representation of the human brain. Finally, more-defined  
606 synthetic hydrogels may enable us to more carefully dissect the functionality of MDMi in 3D cultures  
607 given their consistent and tuneable properties.

608 In conclusion, we describe reproducible and easy-to-generate 3D *in vitro* models of MDMi that are  
609 able to recapitulate potentially important AD-specific differences associated with diseased microglia,  
610 not identified in 2D models. This study opens new doors to generate patient-specific drug testing

611 platforms that support the development of microglia-targeted therapeutic interventions tailored for AD  
612 patients and potentially other neurological disorders.



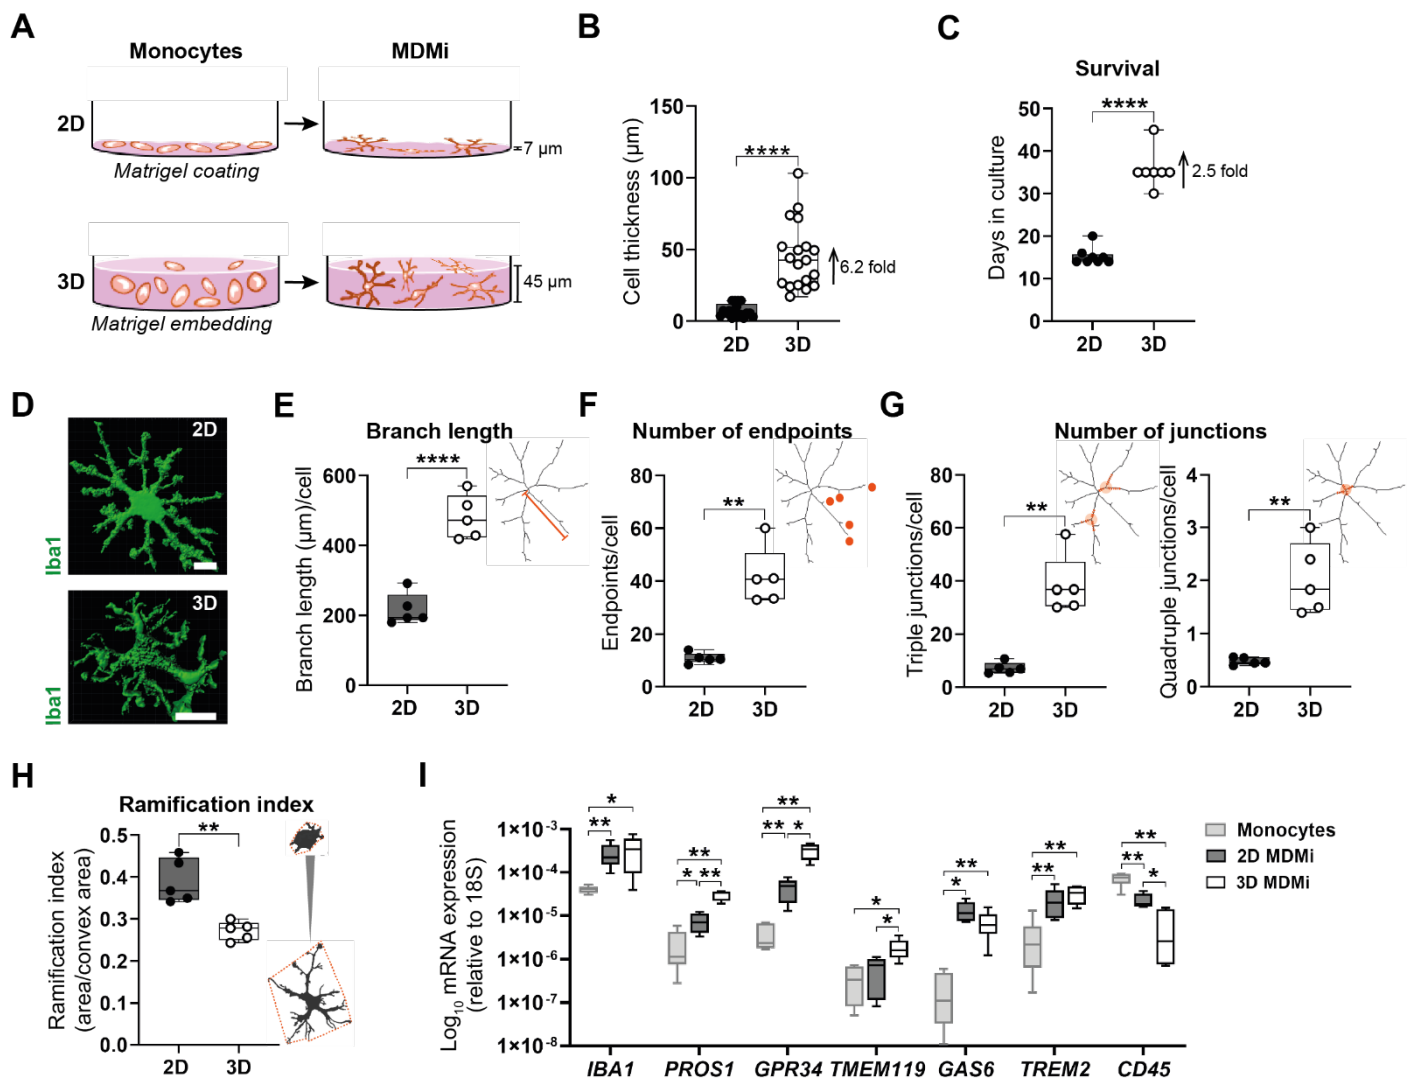

613 **Fig. 1. Generation and characterisation of distinctive microglia features in 2D and 3D MDMi.**  
 614 (A) Schematic illustration of monocyte differentiation into MDMi in 2D, achieved by seeding the monocytes on a Matrigel-coated surface, or in 3D, achieved by embedding the monocytes in a thick  
 615 Matrigel layer. (B) Cell thickness of MDMi in 2D ( $n = 17$  independent cultures) and 3D ( $n = 19$   
 616 independent cultures) cultures. (C) Survival of 2D ( $n = 8$ ) and 3D MDMi ( $n = 7$ ). (D) 3D surface  
 617 rendered images of 2D and 3D MDMi stained for Iba1 (green). Scale bars, 25  $\mu\text{m}$ . Quantification of  
 618 morphological parameters in 2D ( $n = 5$ ) and 3D MDMi ( $n = 5$ ), including (E) branch length, (F)  
 619 number of endpoints, (G) number of junctions, including triple junctions (left) and quadruple junctions  
 620 (right) and (H) ramification index (area/convex area). Representative skeleton and binary images are  
 621 included on the right of each graph to illustrate the morphological measurements. (I) mRNA  
 622 expression of microglia- (*IBA1*, *PROS1*, *GPR34*, *TMEM119*, *GAS6*, *TREM2*) and leukocyte-enriched  
 623 (*CD45*) markers in the starting monocyte population ( $n = 6$ ) and the resulting 2D ( $n = 7$ ) and 3D ( $n =$   
 624 6) MDMi cultures. Data are presented as mean  $\pm$  SD. Each single data point represents one biological  
 625 replicate. Unpaired Student's  $t$  test with or without Welch's correction, two-tailed; one-way ANOVA  
 626 with Tukey's multiple comparison test in I; \* $P < 0.05$ , \*\* $P < 0.01$ , \*\*\*\* $P < 0.0001$ .

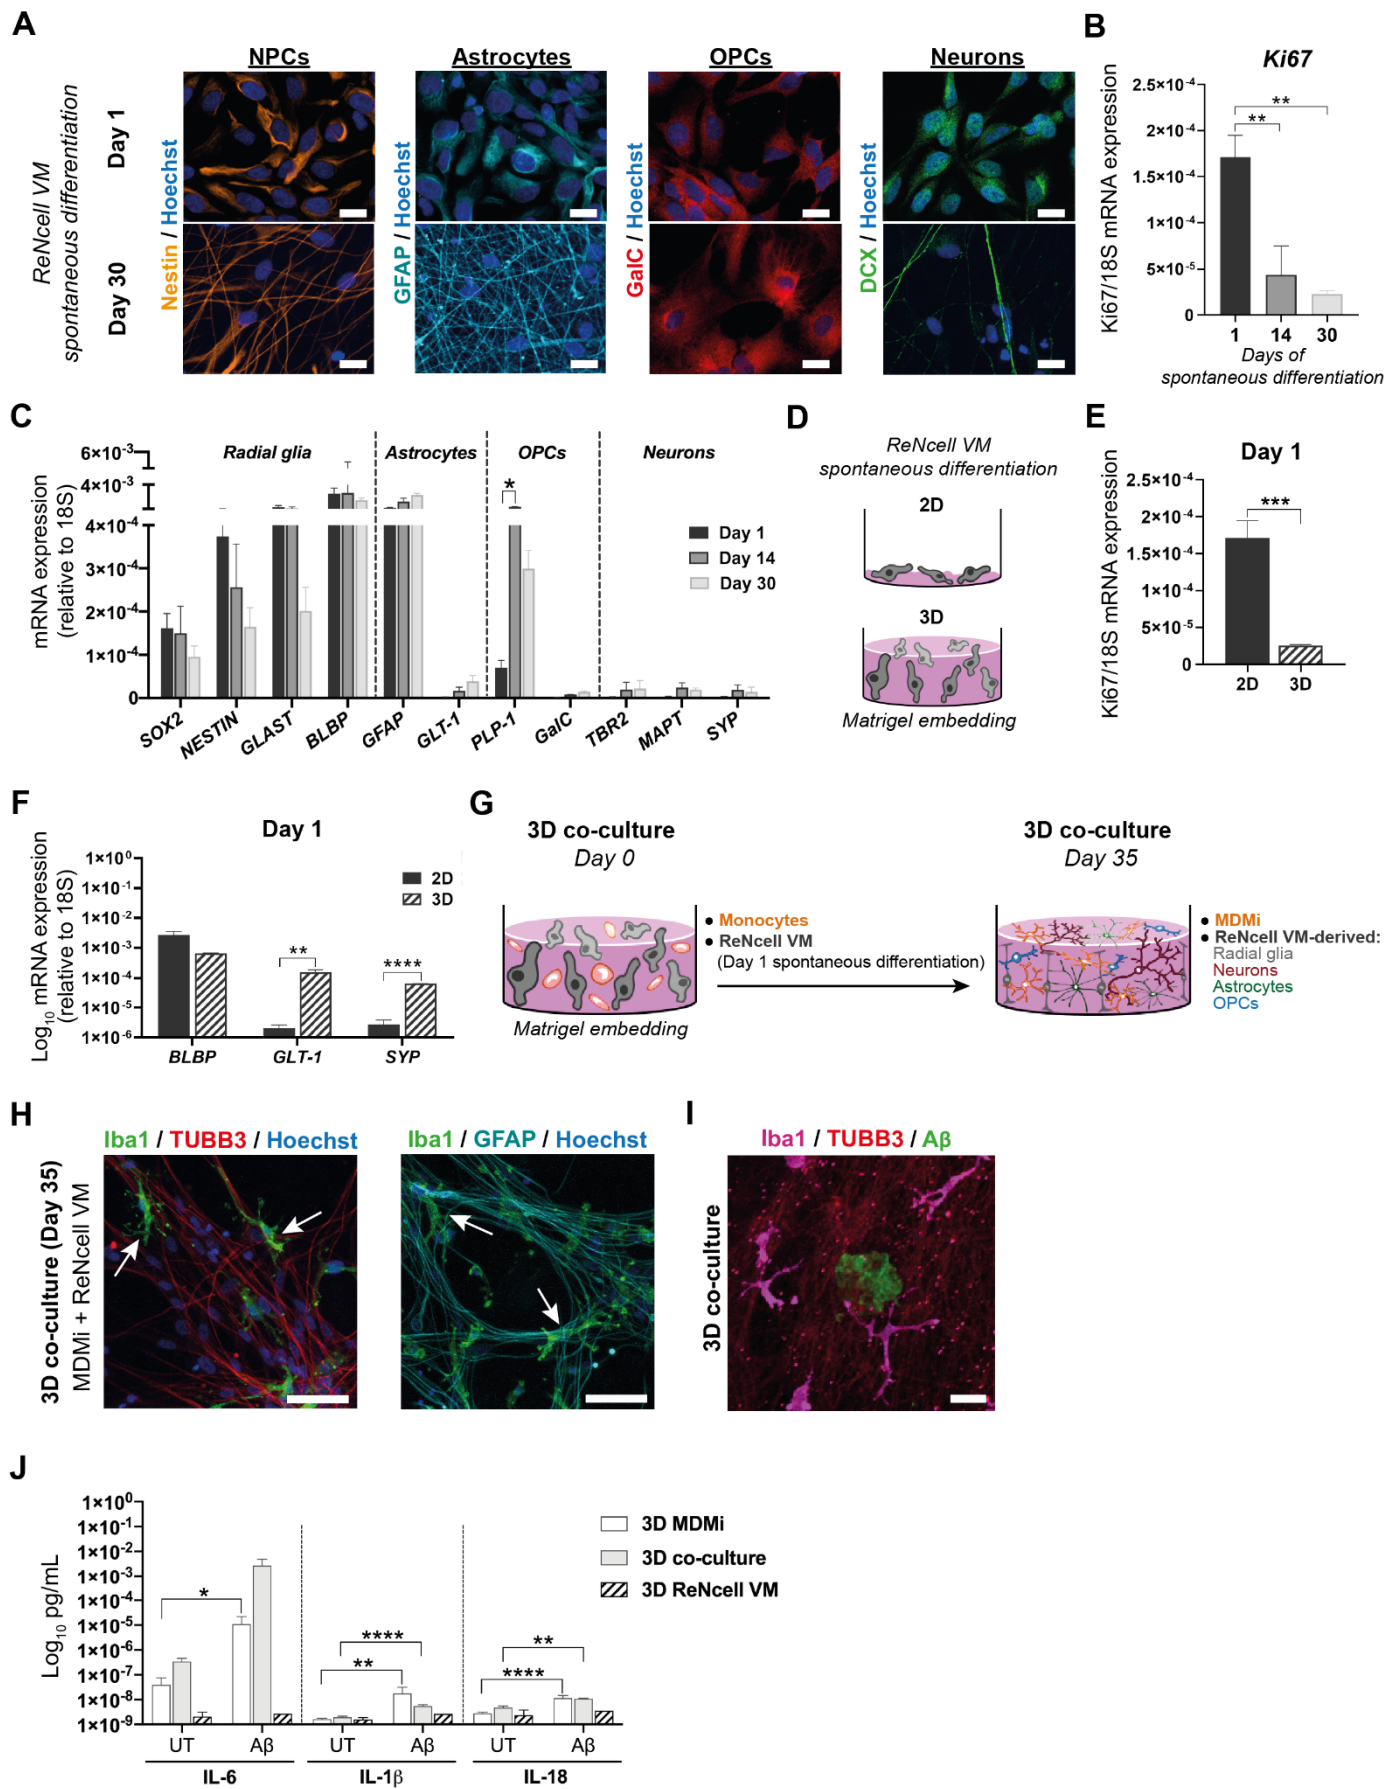

628 **Fig. 2. MDMi in 3D co-culture with ReNcell VM-derived neuro-glial cells exhibit inflammatory**  
629 **responses towards A $\beta$  aggregates. (A)** Immunostaining of 2D ReNcell VM cultures differentiated  
630 for 1 and 30 days shows expression of characteristic markers of neural progenitor cells (NPCs; Nestin),  
631 astrocytes (GFAP), oligodendrocyte progenitor cells (OPCs; GalC) and neurons (Doublecortin, DCX).  
632 Scale bars, 100  $\mu$ m. **(B)** *Ki67* mRNA expression in 2D ReNcell VM cultures differentiated for 1, 14  
633 or 30 days ( $n = 3$  independent experiments). **(C)** mRNA expression of a panel of radial glia (NPCs),  
634 astrocytes, OPCs and neuron markers in 2D ReNcell VM at days 1, 14 and 30 of spontaneous  
635 differentiation ( $n = 3$  independent experiments). **(D)** Schematic of ReNcell VM cultures undergoing  
636 spontaneous differentiation for 1 day in 2D, or in 3D upon embedment in Matrigel. mRNA expression  
637 of **(E)** the proliferation marker *Ki67* alongside the **(F)** the radial glia marker *BLBP*, the mature astrocyte  
638 marker *GLT-1* and the mature neuron marker *Synaptophysin (SYP)* in 2D ( $n = 3$  independent  
639 experiments) and 3D ( $n = 3$  independent experiments) ReNcell VM cultures spontaneously  
640 differentiated for 1 day. **(G)** Schematic depicting how the 3D co-culture is generated: monocytes pre-  
641 mixed with Matrigel are added to a 3D culture of ReNcell VM differentiated for 1 day (left). The co-  
642 culture is left to differentiate for 35 days, giving rise to a mixed population of MDMi with ReNcell  
643 VM-derived neuro-glial cells (right). **(H)** Immunofluorescence analysis of MDMi and ReNcell VM  
644 3D co-culture at day 35 of differentiation. MDMi were stained for Iba1 (arrows) and ReNcell VM  
645 were stained for  $\beta$ 3-tubulin (TUBB3) and GFAP. Scale bars, 100  $\mu$ m. **(I)** Immunofluorescence image  
646 of 3D co-cultures containing FITC-A $\beta$  aggregates. Scale bar, 100  $\mu$ m. **(J)** Concentration of secreted  
647 pro-inflammatory cytokines IL-6, IL-1 $\beta$  and IL-18 by 3D MDMi ( $n = 2$ ) and ReNcell VM ( $n = 1$ )  
648 mono-cultures and 3D co-cultures ( $n = 3$ ) upon exposure to FITC-A $\beta$  aggregates. Data are presented  
649 as mean  $\pm$  SEM. One-way ANOVA with Tukey's multiple comparison test in **B, C**; unpaired Student's  
650 *t* test with or without Welch's correction, two-tailed in **E, F, J**; \* $P < 0.05$ , \*\* $P < 0.01$ , \*\*\* $P < 0.001$ ,  
651 \*\*\*\* $P < 0.0001$ .

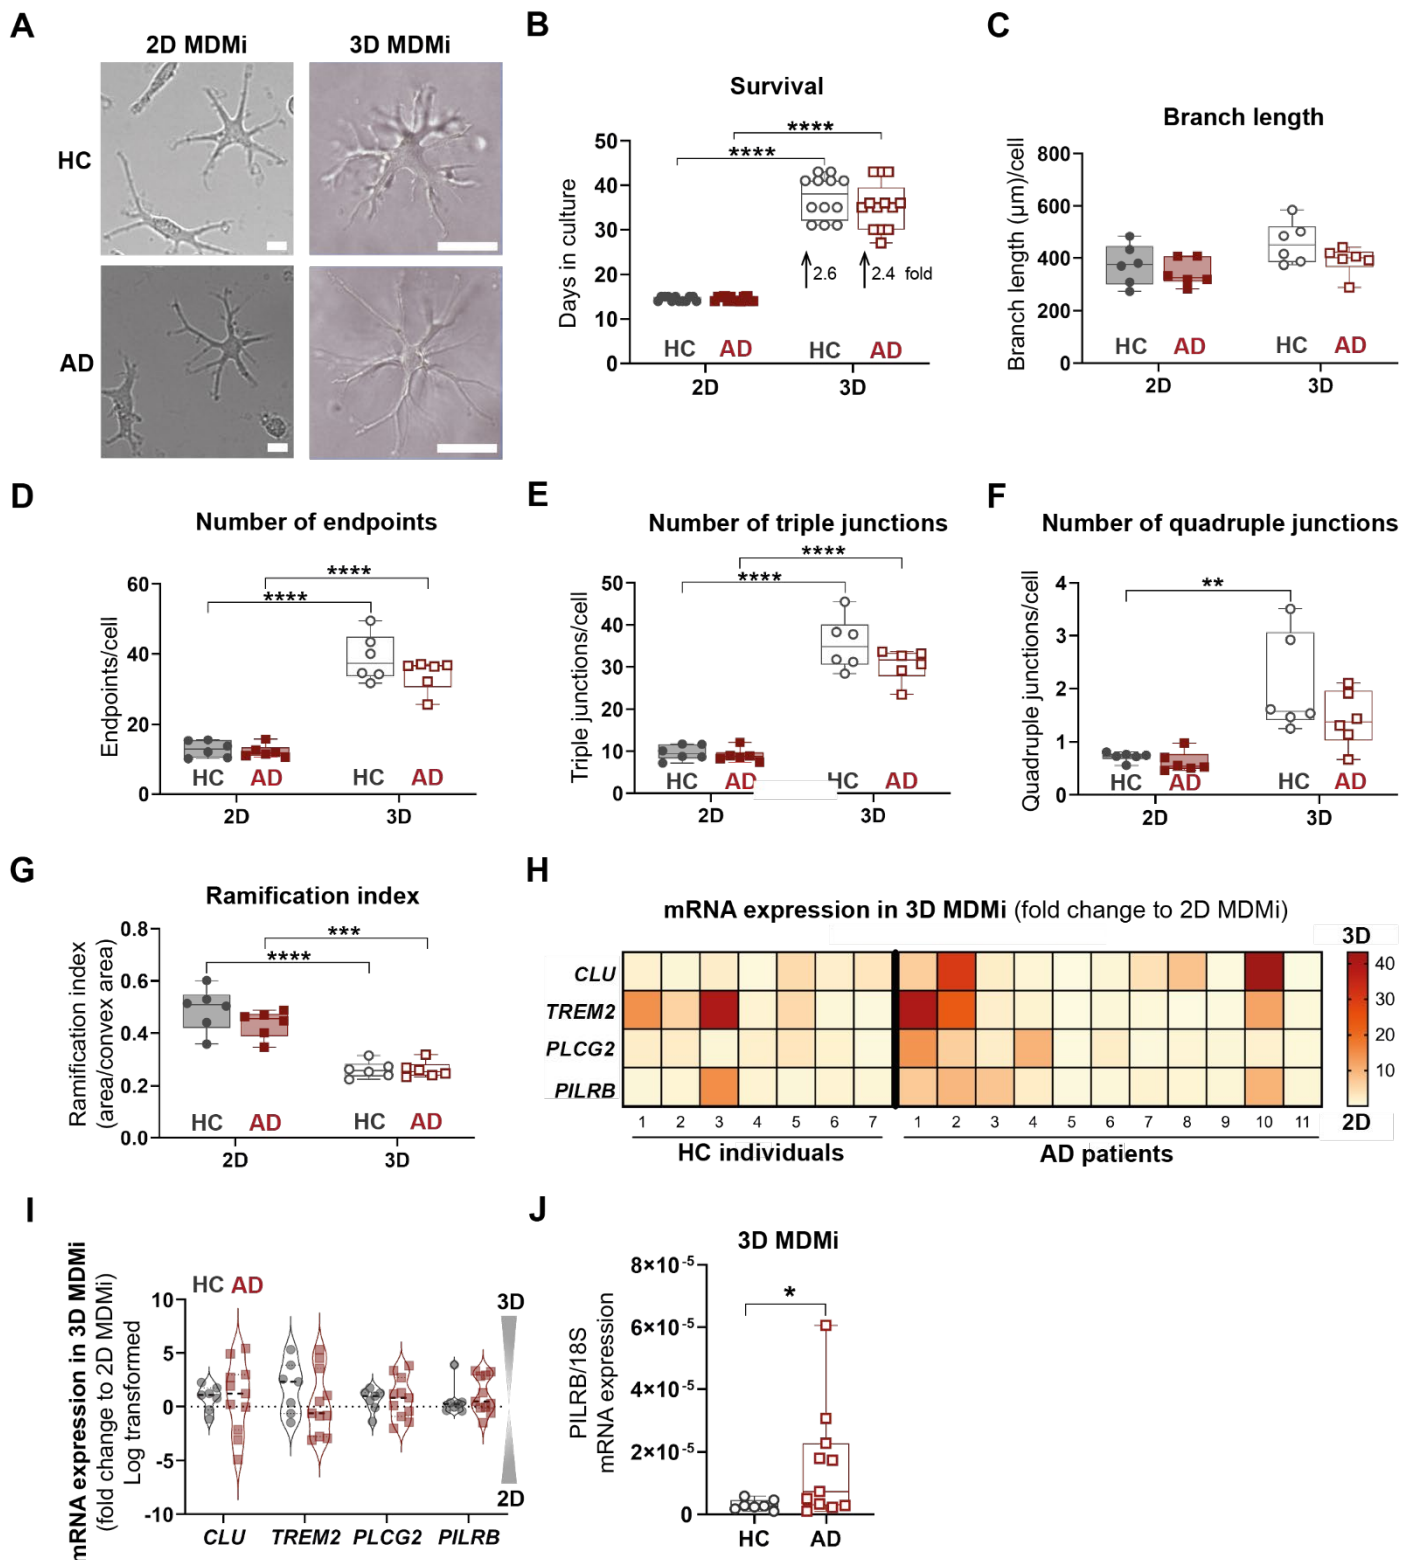

652 **Fig. 3. AD-associated phenotypes in 2D and 3D MDMi mono-cultures related to morphology and**  
 653 **expression of AD risk genes. (A)** Representative bright field images of HC and AD MDMi in 2D and  
 654 3D mono-cultures. Scale bars, 100  $\mu$ m. **(B)** Survival of HC ( $n = 12$ ) and AD ( $n = 13$ ) MDMi in 2D and  
 655 3D mono-cultures. Quantification of morphological parameters in 2D and 3D MDMi from both HC  
 656 ( $n = 6$ ) and AD ( $n = 6$ ) cohorts, including **(C)** branch length, **(D)** number of endpoints, **(E)** number of  
 657 triple junctions, **(F)** number of quadruple junctions and **(G)** ramification index. **(H)** Heatmap  
 658 representing HC ( $n = 7$ ) and AD ( $n = 11$ ) individual-specific fold changes in gene expression levels of

659 the AD risk genes *CLU*, *TREM2*, *PLCG2* and *PILRB* in 3D MDMi compared to 2D. Red-yellow colour  
660 spectrum shows relative fold change of 3D MDMi as compared to 2D MDMi. **(I)** Violin plot  
661 representation of fold change (log transformed) of mRNA expression in 3D to 2D HC ( $n = 7$ ) and AD  
662 ( $n = 11$ ) MDMi. **(J)** mRNA expression of the AD risk gene *PILRB* in 3D HC ( $n = 7$ ) and AD ( $n = 11$ )  
663 MDMi. Data are presented as mean  $\pm$  SD. Each single data point represents one biological replicate.  
664 Two-way ANOVA with Tukey's multiple comparison test; unpaired Student's  $t$  test with or without  
665 Welch's correction, two-tailed in **I**; \* $P < 0.05$ , \*\* $P < 0.01$ , \*\*\* $P < 0.001$ , \*\*\*\* $P < 0.0001$ .



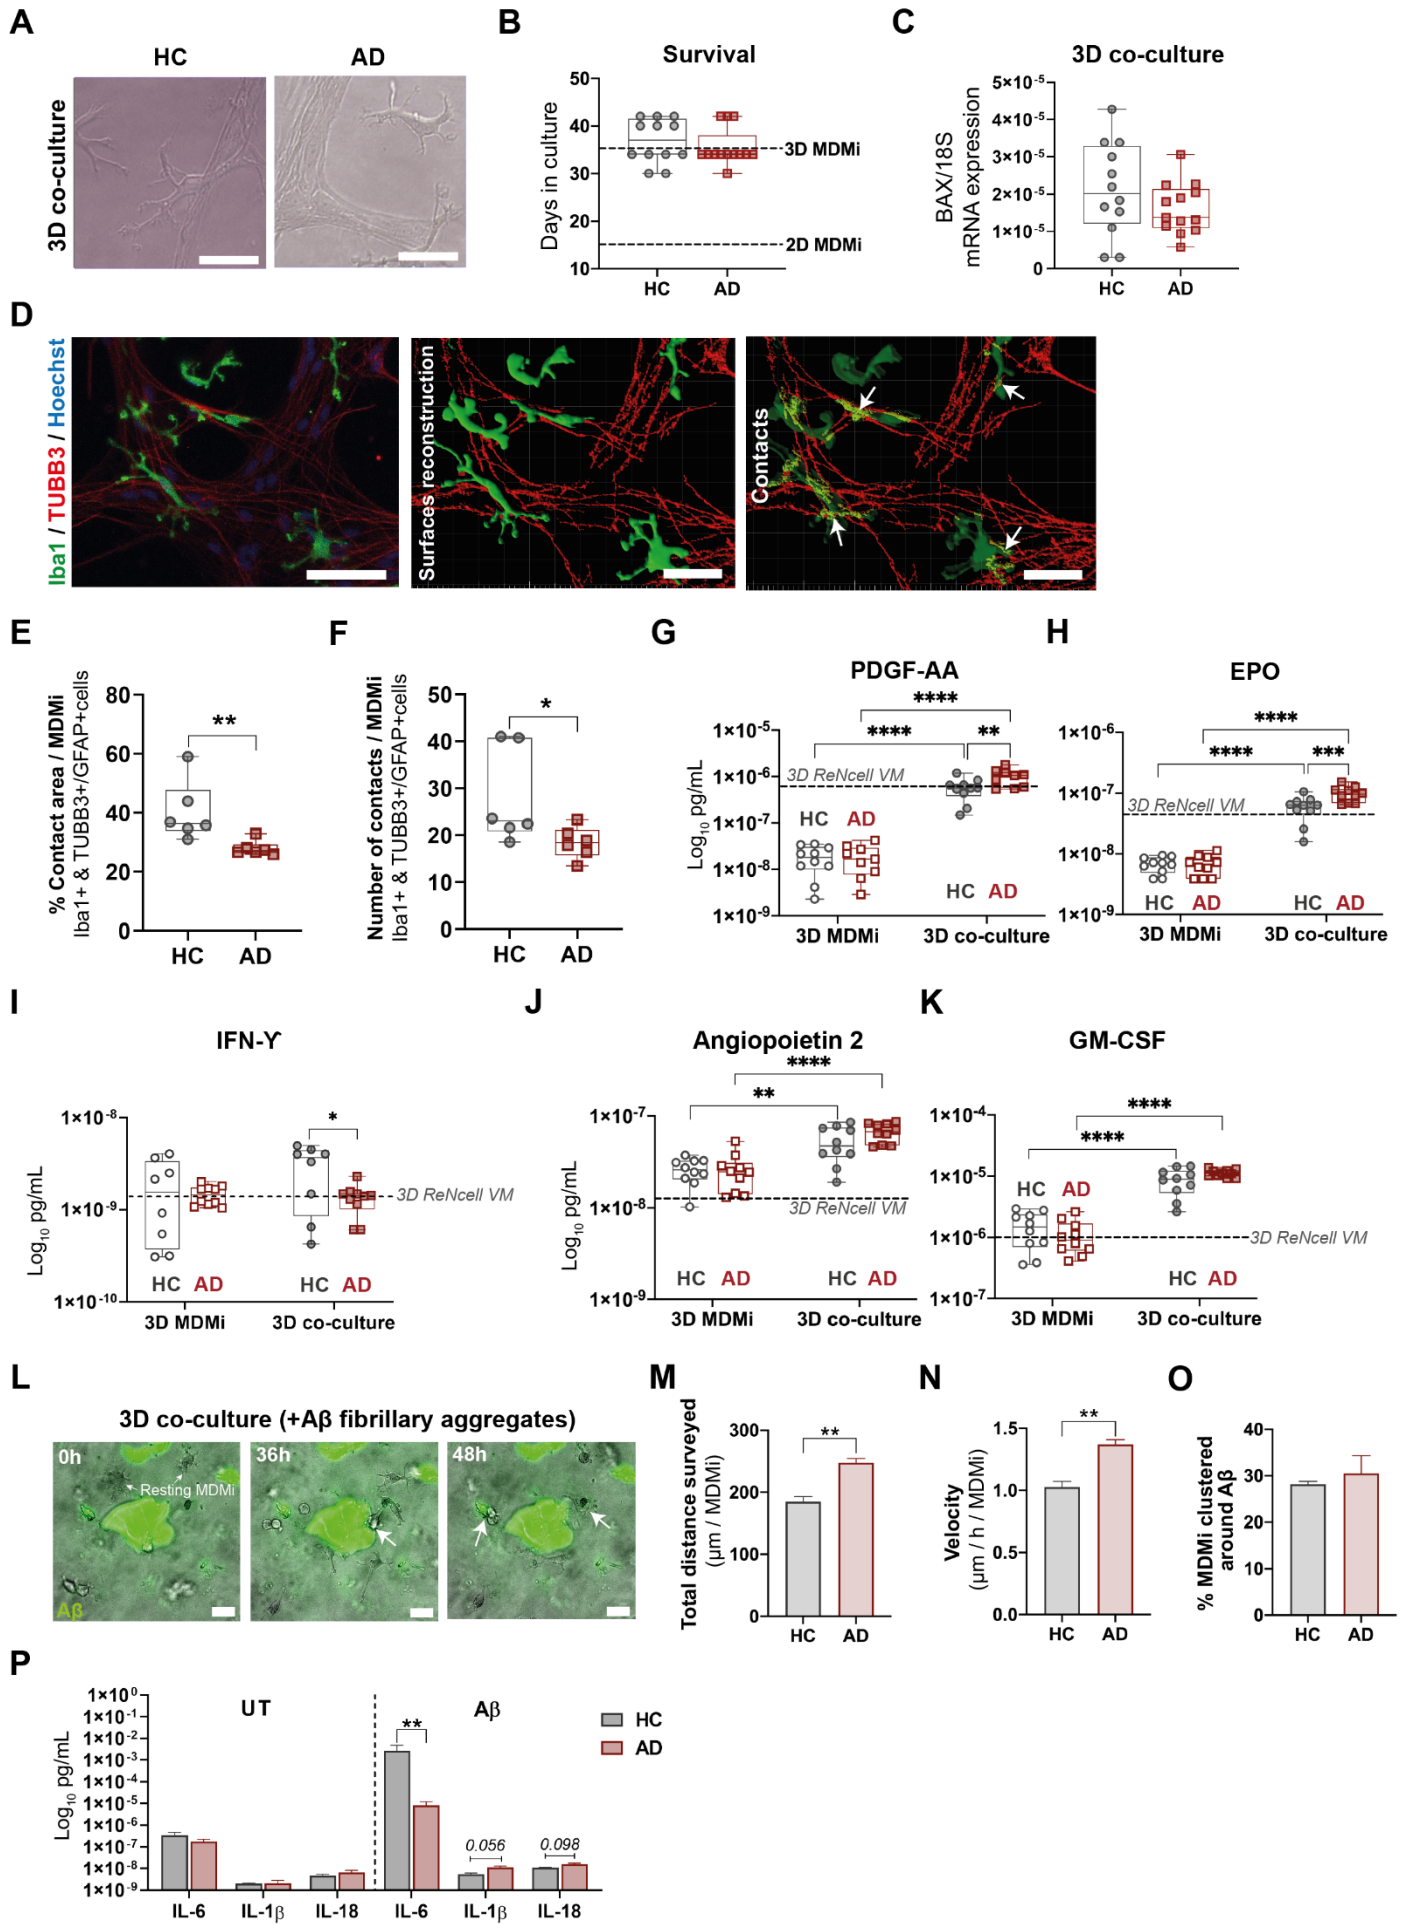

666 **Fig. 4. AD-associated phenotypes in 3D co-cultures related to cell-to-cell interaction with ReNcell**  
667 **VM, secretory activity and responses to A $\beta$  aggregates. (A)** Representative bright field images of  
668 HC and AD co-cultures. Scale bars, 100  $\mu$ m. **(B)** Survival of HC ( $n = 12$ ) and AD ( $n = 13$ ) MDMi in  
669 3D co-cultures. **(C)** Gene expression of the pro-apoptotic marker *BAX* in HC ( $n = 12$ ) and AD ( $n = 13$ )  
670 3D co-cultures. **(D)** Immunostaining against Iba1 (green) and TUBB3 (red) and 3D surface  
671 reconstruction of a 3D co-culture. Areas of contact between Iba1+ (MDMi) and TUBB3+ (ReNcell  
672 VM) cells are highlighted in yellow (white arrows). Scale bars, 100  $\mu$ m. Quantification of **(E)** contact  
673 area and **(F)** number of contacts between Iba1+ and TUBB3+/GFAP+ cells in HC ( $n = 6$ ) and AD ( $n$   
674 = 6) 3D co-cultures. Concentration of **(G)** platelet-derived growth factors AA (PDGF-AA), **(H)**  
675 erythropoietin (EPO), **(I)** interferon- $\gamma$  (IFN- $\gamma$ ), **(J)** angiopoietin 2 and **(K)** granulocyte-macrophage  
676 colony stimulating factor (GM-CSF) secreted by HC ( $n = 8-10$ ) and AD ( $n = 9-10$ ) MDMi in 3D mono-  
677 cultures and co-cultures. Baseline secretion by 3D ReNcell VM mono-cultures is represented with a  
678 dotted black line. **(L)** Representative images of 3D co-cultures containing FITC-A $\beta$  aggregates in  
679 which MDMi exhibit a resting, ramified morphology at 0h and progressively become polarised  
680 acquiring an activated, round morphology with enlarged soma upon reaching and clustering on the A $\beta$   
681 deposit at 36 h and 48 h (white arrows). Scale bars, 100  $\mu$ m. **(M)** Total surveillance distance, **(N)**  
682 velocity and **(O)** clustering around A $\beta$  aggregates of HC ( $n = 2$ ) and AD ( $n = 4$ ) MDMi in 3D co-  
683 cultures containing A $\beta$  aggregates. **(P)** Concentration of pro-inflammatory cytokines IL-6, IL-1 $\beta$  and  
684 IL-18 secreted by untreated (UT) and A $\beta$ -treated HC ( $n = 3$ ) and AD ( $n = 4$ ) MDMi in 3D co-cultures.  
685 Data are presented as mean  $\pm$  SD in **B, C, E-K**; mean  $\pm$  SEM in **M-P**. Each single data point represents  
686 one biological replicate. Unpaired Student's *t* test with or without Welch's correction, two-tailed in **B,**  
687 **C, M-P**; Mann-Whitney test, two-tailed in **E, F**; two-way ANOVA with Tukey's multiple comparison  
688 test in **G-K**; \* $P < 0.05$ , \*\* $P < 0.01$ , \*\*\* $P < 0.001$ , \*\*\*\* $P < 0.0001$ .



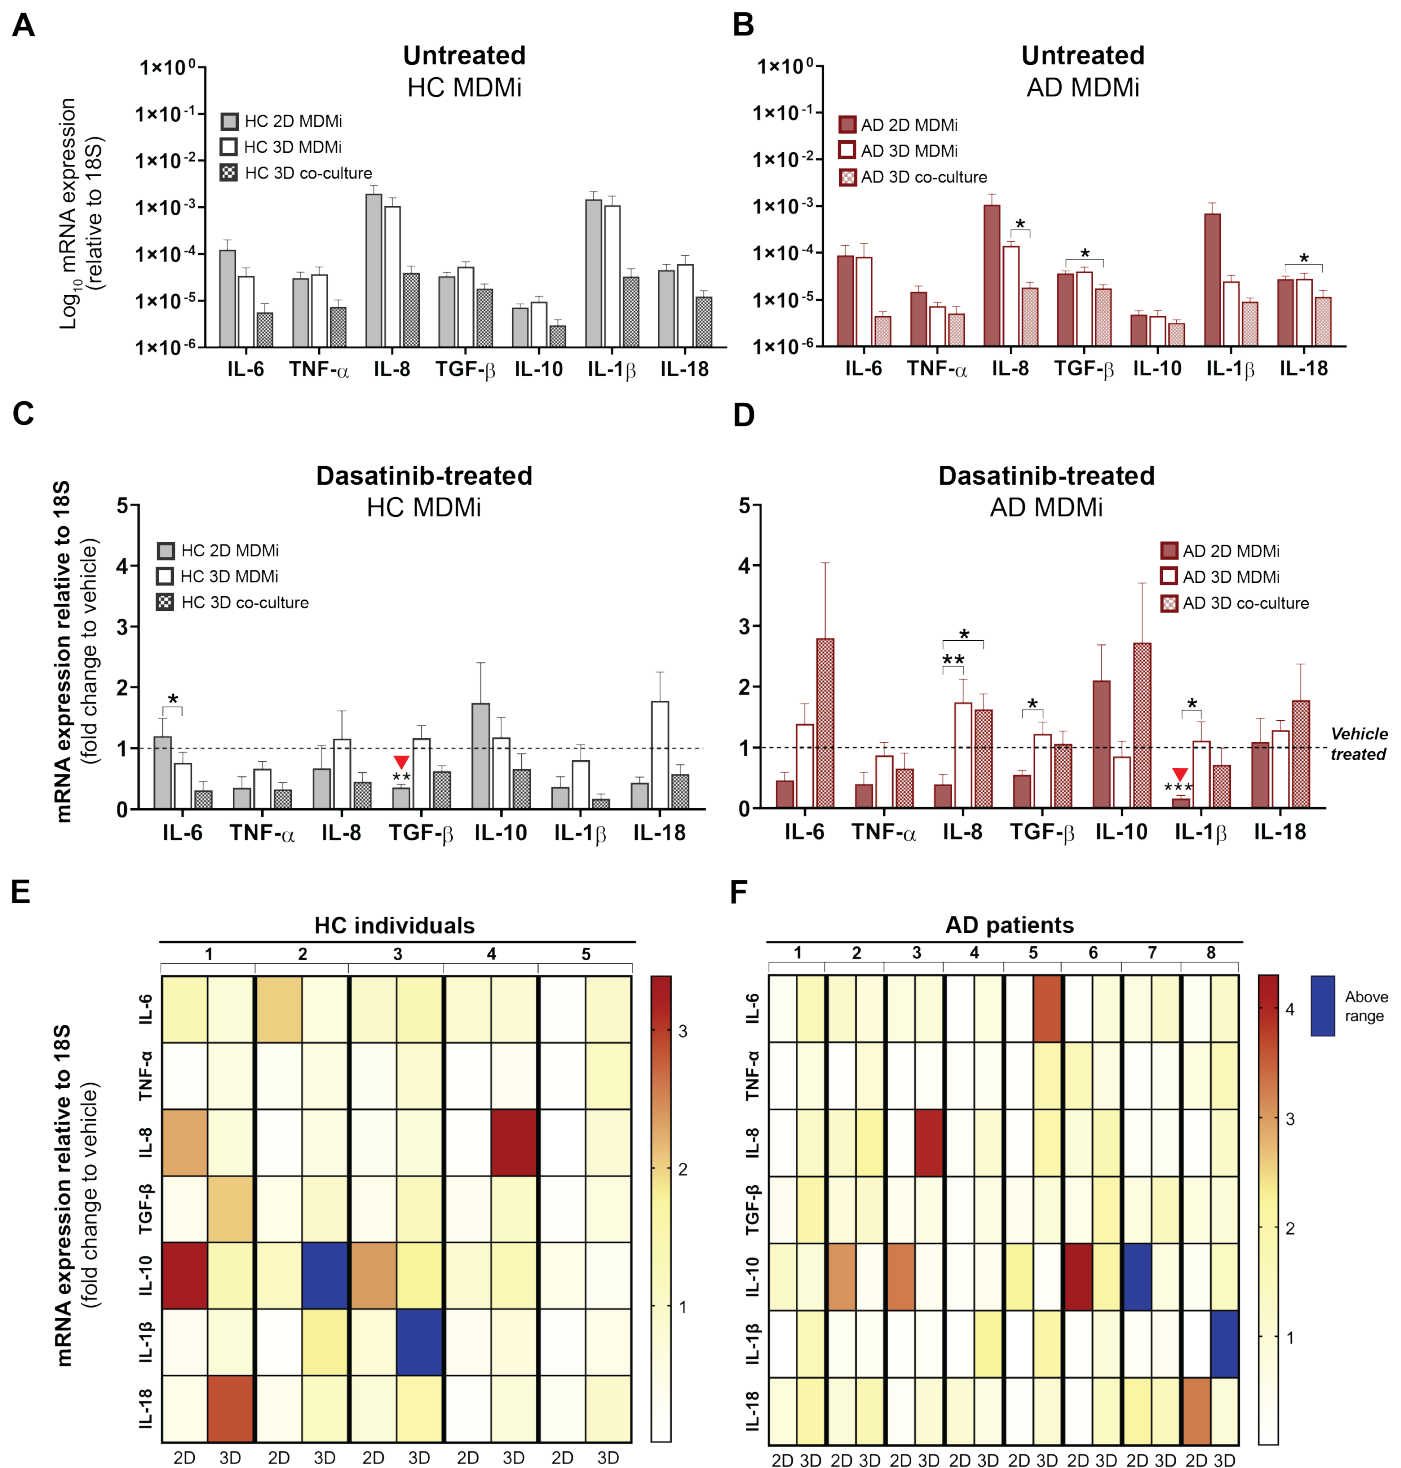

689 **Fig. 5. Dasatinib treatment induces cytokine expression responses that differ between culture**  
 690 **format and are heterogeneous among HC and AD MDMi.** Log-transformed mRNA expression of  
 691 the inflammatory cytokines IL-6, TNF- $\alpha$ , IL-8, TGF- $\beta$ , IL-10, IL-1 $\beta$  and IL-18 in untreated (A) HC ( $n$   
 692 = 8) MDMi and (B) AD ( $n$  = 12) MDMi in all culture formats (2D and 3D mono-cultures and 3D co-  
 693 cultures). Fold change in cytokine mRNA expression levels following 24 h exposure to 100nM  
 694 dasatinib compared to vehicle (DMSO)-treated cultures in (C) HC ( $n$  = 6) and (D) AD ( $n$  = 8) 2D and  
 695 3D MDMi mono-cultures and 3D co-cultures. Red arrowheads indicate significance compared to  
 696 vehicle-treated condition. Dotted black lines represent baseline responses of vehicle-treated cultures.  
 697 Heatmaps showing (E) HC ( $n$  = 5) and (F) AD ( $n$  = 8) donors-specific changes in mRNA expression

698 from MDMi mono-cultures in 2D and 3D. Red-yellow colour spectrum represents relative fold change  
699 of mRNA expression after dasatinib treatment compared to vehicle. Expression changes falling outside  
700 the displayed range are indicated in dark blue. Data are presented as mean  $\pm$  SEM. One-way ANOVA  
701 with Dunnett's multiple comparison test;  $**P < 0.01$ ,  $**P < 0.01$ ,  $***P < 0.001$ .

702 **Acknowledgements:** We would like to thank the volunteers from QIMR Berghofer who have donated  
703 blood to this project and the participants recruited through the PISA study. We also thank the  
704 Microscopy, Flow cytometry, Sample Processing and Statistical teams at QIMR Berghofer for their  
705 assistance. Special thanks to Kurt Giuliani for helpful insights on LEGENDplex™ data analysis. Lastly,  
706 we acknowledge the coordinators of the PISA study, Professor Michael Breakspear, Jessica Adsett  
707 and Natalie Garden.

708 **Funding:** This study was supported by grants from NHMRC (APP1125796). PISA is funded by a  
709 National Health and Medical Research Council (NHMRC) Boosting Dementia Research Initiative  
710 Team Grant (APP1095227). C.C-L. is recipient of The University of Queensland PhD scholarship.  
711 M.K.L. is supported by an NHMRC Boosting Dementia Leadership Fellowship (APP1140441).  
712 A.R.W. is supported by an NHMRC Senior Research Fellowship (APP1118452).

713 **Author contributions:** C.C-L., H.Q., L.E.O. and A.R.W. conceived and designed the study. C.C-L.  
714 and H.Q. performed experiments. C.C-L., H.Q. and T.H.N. analysed data. C.C-L., H.Q., R.S. and  
715 A.R.W. interpreted data. Y.S., C.C.G. and M.K.L. coordinated blood collection from the PISA study.  
716 C.C-L. wrote the manuscript. H.Q., R.S., L.E.O. and A.R.W. provided critical feedback in reviewing  
717 and editing. All authors reviewed and commented on the final version of the manuscript.

718 **Competing interests:** A.R.W. and H.Q. are listed as co-inventors of provisional patent  
719 AU2020/050513. The authors declare no other competing interests.

720 **References**

- 721 1. K. Gammon, Neurodegenerative disease: brain windfall. *Nature* **515**, 299-300 (2014).
- 722 2. X. Wang, W. Wang, L. Li, G. Perry, H.-g. Lee, X. Zhu, Oxidative stress and mitochondrial  
723 dysfunction in Alzheimer's disease. *Biochim. Biophys. Acta Biochim Biophys Acta* **1842**,  
724 1240-1247 (2014).
- 725 3. F. L. Heppner, R. M. Ransohoff, B. Becher, Immune attack: the role of inflammation in  
726 Alzheimer disease. *Nat. Rev. Neurosci.* **16**, 358-372 (2015).
- 727 4. M. T. Heneka, M. J. Carson, J. El Khoury, G. E. Landreth, F. Brosseron, D. L. Feinstein, A.  
728 H. Jacobs, T. Wyss-Coray, J. Vitorica, R. M. Ransohoff, Neuroinflammation in Alzheimer's  
729 disease. *Lancet Neurol.* **14**, 388-405 (2015).
- 730 5. C. R. Jack Jr, D. S. Knopman, W. J. Jagust, L. M. Shaw, P. S. Aisen, M. W. Weiner, R. C.  
731 Petersen, J. Q. Trojanowski, Hypothetical model of dynamic biomarkers of the Alzheimer's  
732 pathological cascade. *The Lancet Neurology* **9**, 119-128 (2010).
- 733 6. L. Rajendran, R. C. Paolicelli, Microglia-mediated synapse loss in Alzheimer's disease. *J.*  
734 *Neurosci.* **38**, 2911-2919 (2018).
- 735 7. C. Bellenguez, B. Grenier-Boley, J.-C. Lambert, Genetics of Alzheimer's disease: Where we  
736 are, and where we are going. *Curr. Opin. Neurobiol.* **61**, 40-48 (2020).
- 737 8. D. V. Hansen, J. E. Hanson, M. Sheng, Microglia in Alzheimer's disease. *J. Cell Biol.* **217**,  
738 459-472 (2018).
- 739 9. M. Allen, M. Kachadorian, M. M. Carrasquillo, A. Karhade, L. Manly, J. D. Burgess, C.  
740 Wang, D. Serie, X. Wang, J. Siuda, F. Zou, H. S. Chai, C. Younkin, J. Crook, C. Medway, T.  
741 Nguyen, L. Ma, K. Malphrus, S. Lincoln, R. C. Petersen, N. R. Graff-Radford, Y. W.  
742 Asmann, D. W. Dickson, S. G. Younkin, N. Ertekin-Taner, Late-onset Alzheimer disease risk  
743 variants mark brain regulatory loci. *Neurology Genetics* **1**, e15 (2015).
- 744 10. K. Srinivasan, B. A. Friedman, J. L. Larson, B. E. Lauffer, L. D. Goldstein, L. L. Appling, J.  
745 Borneo, C. Poon, T. Ho, F. Cai, Untangling the brain's neuroinflammatory and  
746 neurodegenerative transcriptional responses. *Nature communications* **7**, 1-16 (2016).
- 747 11. K. Srinivasan, B. A. Friedman, A. Etxeberria, M. A. Huntley, M. P. van Der Brug, O.  
748 Foreman, J. S. Paw, Z. Modrusan, T. G. Beach, G. E. Serrano, Alzheimer's patient microglia  
749 exhibit enhanced aging and unique transcriptional activation. *Cell Rep.* **31**, 107843 (2020).
- 750 12. H. Keren-Shaul, A. Spinrad, A. Weiner, O. Matcovitch-Natan, R. Dvir-Szternfeld, T. K.  
751 Ulland, E. David, K. Baruch, D. Lara-Astaiso, B. Toth, A unique microglia type associated  
752 with restricting development of Alzheimer's disease. *Cell* **169**, 1276-1290. e1217 (2017).
- 753 13. B. De Strooper, E. Karran, The cellular phase of Alzheimer's disease. *Cell* **164**, 603-615  
754 (2016).
- 755 14. C. Sala Frigerio, L. Wolfs, N. Fattorelli, N. Thrupp, I. Voytyuk, I. Schmidt, R. Mancuso, W.  
756 T. Chen, M. E. Woodbury, G. Srivastava, T. Möller, E. Hudry, S. Das, T. Saido, E. Karran,  
757 B. Hyman, V. H. Perry, M. Fiers, B. De Strooper, The Major Risk Factors for Alzheimer's  
758 Disease: Age, Sex, and Genes Modulate the Microglia Response to A $\beta$  Plaques. *Cell Rep.* **27**,  
759 1293-1306. e1296 (2019).
- 760 15. A. Sierksma, A. Lu, R. Mancuso, N. Fattorelli, N. Thrupp, E. Salta, J. Zoco, D. Blum, L.  
761 Buée, B. De Strooper, Novel Alzheimer risk genes determine the microglia response to  
762 amyloid- $\beta$  but not to TAU pathology. *EMBO Mol. Med.* **12**, e10606 (2020).
- 763 16. B. Stansley, J. Post, K. Hensley, A comparative review of cell culture systems for the study  
764 of microglial biology in Alzheimer's disease. *J. Neuroinflammation* **9**, 1-8 (2012).
- 765 17. W. Haenseler, L. Rajendran, Concise Review: Modeling Neurodegenerative Diseases with  
766 Human Pluripotent Stem Cell-Derived Microglia. *Stem Cells* **37**, 724-730 (2019).
- 767 18. I. R. Holtman, D. D. Raj, J. A. Miller, W. Schaafsma, Z. Yin, N. Brouwer, P. D. Wes, T.  
768 Möller, M. Orre, W. Kamphuis, E. M. Hol, E. W. G. M. Boddeke, B. J. L. Eggen, Induction  
769 of a common microglia gene expression signature by aging and neurodegenerative

- 770 conditions: a co-expression meta-analysis. *Acta neuropathologica communications* **3**, 31-31  
771 (2015).
- 772 19. T. F. Galatro, I. R. Holtman, A. M. Lerario, I. D. Vainchtein, N. Brouwer, P. R. Sola, M. M.  
773 Veras, T. F. Pereira, R. E. P. Leite, T. Möller, P. D. Wes, M. C. Sogayar, J. D. Laman, W.  
774 den Dunnen, C. A. Pasqualucci, S. M. Oba-Shinjo, E. W. G. M. Boddeke, S. K. N. Marie, B.  
775 J. L. Eggen, Transcriptomic analysis of purified human cortical microglia reveals age-  
776 associated changes. *Nat. Neurosci.* **20**, 1162-1171 (2017).
- 777 20. D. Gosselin, D. Skola, N. G. Coufal, I. R. Holtman, J. C. M. Schlachetzki, E. Sajti, B. N.  
778 Jaeger, C. O'Connor, C. Fitzpatrick, M. P. Pasillas, M. Pena, A. Adair, D. D. Gonda, M. L.  
779 Levy, R. M. Ransohoff, F. H. Gage, C. K. Glass, An environment-dependent transcriptional  
780 network specifies human microglia identity. *Science* **356**, eaal3222 (2017).
- 781 21. A. M. Smith, M. Dragunow, The human side of microglia. *Trends Neurosci.* **37**, 125-135  
782 (2014).
- 783 22. O. Butovsky, M. P. Jedrychowski, C. S. Moore, R. Cialic, A. J. Lanser, G. Gabriely, T.  
784 Koeglspenger, B. Dake, P. M. Wu, C. E. Doykan, Z. Fanek, L. Liu, Z. Chen, J. D. Rothstein,  
785 R. M. Ransohoff, S. P. Gygi, J. P. Antel, H. L. Weiner, Identification of a unique TGF- $\beta$ -  
786 dependent molecular and functional signature in microglia. *Nat. Neurosci.* **17**, 131-143  
787 (2014).
- 788 23. A. Das, S. H. Kim, S. Arifuzzaman, T. Yoon, J. C. Chai, Y. S. Lee, K. S. Park, K. H. Jung, Y.  
789 G. Chai, Transcriptome sequencing reveals that LPS-triggered transcriptional responses in  
790 established microglia BV2 cell lines are poorly representative of primary microglia. *J.*  
791 *Neuroinflammation* **13**, 1-18 (2016).
- 792 24. J. Melief, M. Sneeboer, M. Litjens, P. Ormel, S. Palmen, I. Huitinga, R. Kahn, E. Hol, L. de  
793 Witte, Characterizing primary human microglia: A comparative study with myeloid subsets  
794 and culture models. *Glia* **64**, 1857-1868 (2016).
- 795 25. A. M. Sabogal-Guáqueta, A. Marmolejo-Garza, V. P. de Pádua, B. Eggen, E. Boddeke, A. M.  
796 Dolga, Microglia alterations in neurodegenerative diseases and their modeling with human  
797 induced pluripotent stem cell and other platforms. *Prog. Neurobiol.* **190**, 101805 (2020).
- 798 26. J. Mertens, D. Reid, S. Lau, Y. Kim, F. H. Gage, Aging in a Dish: iPSC-Derived and Directly  
799 Induced Neurons for Studying Brain Aging and Age-Related Neurodegenerative Diseases.  
800 *Annu. Rev. Genet.* **52**, 271-293 (2018).
- 801 27. C. M. Sellgren, J. Gracias, B. Watmuff, J. D. Biag, J. M. Thanos, P. B. Whittredge, T. Fu, K.  
802 Worringer, H. E. Brown, J. Wang, A. Kaykas, R. Karmacharya, C. P. Goold, S. D. Sheridan,  
803 R. H. Perlis, Increased synapse elimination by microglia in schizophrenia patient-derived  
804 models of synaptic pruning. *Nat. Neurosci.* **22**, 374-385 (2019).
- 805 28. P. R. Ormel, C. Böttcher, F. A. J. Gigase, R. D. Missall, W. van Zuiden, M. C. Fernández  
806 Zapata, D. Ilhan, M. de Goeij, E. Udine, I. E. C. Sommer, J. Priller, T. Raj, R. S. Kahn, E. M.  
807 Hol, L. D. de Witte, A characterization of the molecular phenotype and inflammatory  
808 response of schizophrenia patient-derived microglia-like cells. *Brain, Behav., Immun.* **90**,  
809 196-207 (2020).
- 810 29. M. Ohgidani, T. A. Kato, D. Setoyama, N. Sagata, R. Hashimoto, K. Shigenobu, T. Yoshida,  
811 K. Hayakawa, N. Shimokawa, D. Miura, H. Utsumi, S. Kanba, Direct induction of ramified  
812 microglia-like cells from human monocytes: Dynamic microglial dysfunction in Nasu-Hakola  
813 disease. *Sci. Rep.* **4**, 4957 (2014).
- 814 30. H. Quek, C. Cuní-López, R. Stewart, T. Colletti, A. Notaro, Y. Sun, C. C. Guo, M. K.  
815 Lupton, T. H. Nguyen, L. E. Oikari, T. L. Roberts, Y. C. Lim, V. La Bella, A. R. White, ALS  
816 monocyte-derived microglia reveal cytoplasmic TDP-43 accumulation, DNA damage, and  
817 cell-specific impairment of phagocytosis associated with disease progression. *bioRxiv*,  
818 2020.2010.2025.354399 (2020).

- 819 31. K. J. Ryan, C. C. White, K. Patel, J. Xu, M. Olah, J. M. Replogle, M. Frangieh, M. Cimpean,  
820 P. Winn, A. McHenry, B. J. Kaskow, G. Chan, N. Cuerdon, D. A. Bennett, J. D. Boyd, J.  
821 Imitola, W. Elyaman, P. L. De Jager, E. M. Bradshaw, A human microglia-like cellular  
822 model for assessing the effects of neurodegenerative disease gene variants. *Sci. Transl. Med.*  
823 **9**, eaai7635 (2017).
- 824 32. J. Penney, W. T. Ralvenius, L.-H. Tsai, Modeling Alzheimer's disease with iPSC-derived  
825 brain cells. *Mol. Psychiatry* **25**, 148-167 (2020).
- 826 33. P. M. D. Watson, E. Kavanagh, G. Allenby, M. Vasse, Bioengineered 3D glial cell culture  
827 systems and applications for neurodegeneration and neuroinflammation. *SLAS Discov.* **22**,  
828 583-601 (2017).
- 829 34. S. H. Choi, Y. H. Kim, M. Hebisch, C. Sliwinski, S. Lee, C. D'Avanzo, H. Chen, B. Hooli,  
830 C. Asselin, J. Muffat, J. B. Klee, C. Zhang, B. J. Wainger, M. Peitz, D. M. Kovacs, C. J.  
831 Woolf, S. L. Wagner, R. E. Tanzi, D. Y. Kim, A three-dimensional human neural cell culture  
832 model of Alzheimer's disease. *Nature* **515**, 274-278 (2014).
- 833 35. C. D'Avanzo, J. Aronson, Y. H. Kim, S. H. Choi, R. E. Tanzi, D. Y. Kim, Alzheimer's in 3D  
834 culture: challenges and perspectives. *Bioessays* **37**, 1139-1148 (2015).
- 835 36. A. Hedegaard, S. Stodolak, W. S. James, S. A. Cowley, Honing the Double-Edged Sword:  
836 Improving Human iPSC-Microglia Models. *Front. Immunol.* **11**, (2020).
- 837 37. M. K. Lupton, G. A. Robinson, R. J. Adam, S. Rose, G. J. Byrne, O. Salvado, N. A. Pachana,  
838 O. P. Almeida, K. McAloney, S. D. Gordon, P. Raniga, A. Fazlollahi, Y. Xia, A. Ceslis, S.  
839 Sonkusare, Q. Zhang, M. Kholghi, M. Karunanithi, P. E. Mosley, J. Lv, L. Borne, J. Adsett,  
840 N. Garden, J. Fripp, N. G. Martin, C. C. Guo, M. Breakspear, A prospective cohort study of  
841 prodromal Alzheimer's disease: Prospective Imaging Study of Ageing: Genes, Brain and  
842 Behaviour (PISA). *NeuroImage: Clinical* **29**, 102527-102527 (2021).
- 843 38. Y. H. Kim, S. H. Choi, C. D'Avanzo, M. Hebisch, C. Sliwinski, E. Bylykbashi, K. J.  
844 Washicosky, J. B. Klee, O. Brüstle, R. E. Tanzi, D. Y. Kim, A 3D human neural cell culture  
845 system for modeling Alzheimer's disease. *Nat. Protoc.* **10**, 985-1006 (2015).
- 846 39. L. E. Oikari, R. Pandit, R. Stewart, C. Cuní-López, H. Quek, R. Sutharsan, L. M. Rantanen,  
847 M. Oksanen, S. Lehtonen, C. M. de Boer, J. M. Polo, J. Götz, J. Koistinaho, A. R. White,  
848 Altered Brain Endothelial Cell Phenotype from a Familial Alzheimer Mutation and Its  
849 Potential Implications for Amyloid Clearance and Drug Delivery. *Stem Cell Reports* **14**, 924-  
850 939 (2020).
- 851 40. K. Young, H. Morrison, Quantifying Microglia Morphology from Photomicrographs of  
852 Immunohistochemistry Prepared Tissue Using ImageJ. *J Vis Exp*, 57648 (2018).
- 853 41. E. R. Zanier, S. Fumagalli, C. Perego, F. Pischiutta, M.-G. De Simoni, Shape descriptors of  
854 the "never resting" microglia in three different acute brain injury models in mice. *Intensive*  
855 *Care Med Exp* **3**, 39-39 (2015).
- 856 42. J.-i. Satoh, Y. Kino, N. Asahina, M. Takitani, J. Miyoshi, T. Ishida, Y. Saito, TMEM119  
857 marks a subset of microglia in the human brain. *Neuropathology* **36**, 39-49 (2016).
- 858 43. R. Donato, E. A. Miljan, S. J. Hines, S. Aouabdi, K. Pollock, S. Patel, F. A. Edwards, J. D.  
859 Sinden, Differential development of neuronal physiological responsiveness in two human  
860 neural stem cell lines. *BMC Neurosci.* **8**, 36 (2007).
- 861 44. Y. Song, K. Subramanian, M. J. Berberich, S. Rodriguez, I. J. Latorre, C. M. Luria, R.  
862 Everley, M. W. Albers, T. J. Mitchison, P. K. Sorger, A dynamic view of the proteomic  
863 landscape during differentiation of ReNcell VM cells, an immortalized human neural  
864 progenitor line. *Scientific Data* **6**, 190016 (2019).
- 865 45. J. Park, I. Wetzel, I. Marriott, D. Dréau, C. D'Avanzo, D. Y. Kim, R. E. Tanzi, H. Cho, A 3D  
866 human triculture system modeling neurodegeneration and neuroinflammation in Alzheimer's  
867 disease. *Nat. Neurosci.* **21**, 941-951 (2018).



- 868 46. S. A. Frautschy, F. Yang, M. Irrizarry, B. Hyman, T. C. Saido, K. Hsiao, G. M. Cole,  
869 Microglial response to amyloid plaques in APPsw transgenic mice. *Am. J. Pathol.* **152**, 307-  
870 317 (1998).
- 871 47. M. Stalder, A. Phinney, A. Probst, B. Sommer, M. Staufenbiel, M. Jucker, Association of  
872 microglia with amyloid plaques in brains of APP23 transgenic mice. *Am. J. Pathol.* **154**,  
873 1673-1684 (1999).
- 874 48. M. Colonna, O. Butovsky, Microglia Function in the Central Nervous System During Health  
875 and Neurodegeneration. *Annu. Rev. Immunol.* **35**, 441-468 (2017).
- 876 49. L. Zhong, Y. Xu, R. Zhuo, T. Wang, K. Wang, R. Huang, D. Wang, Y. Gao, Y. Zhu, X.  
877 Sheng, K. Chen, N. Wang, L. Zhu, D. Can, Y. Marten, M. Shinohara, C.-C. Liu, D. Du, H.  
878 Sun, L. Wen, H. Xu, G. Bu, X.-F. Chen, Soluble TREM2 ameliorates pathological  
879 phenotypes by modulating microglial functions in an Alzheimer's disease model. *Nat.*  
880 *Commun.* **10**, 1365 (2019).
- 881 50. C. Zheng, X.-W. Zhou, J.-Z. Wang, The dual roles of cytokines in Alzheimer's disease:  
882 update on interleukins, TNF- $\alpha$ , TGF- $\beta$  and IFN- $\gamma$ . *Transl. Neurodegener.* **5**, 7 (2016).
- 883 51. K.-Y. Ryu, H.-j. Lee, H. Woo, R.-J. Kang, K.-M. Han, H. Park, S. M. Lee, J.-Y. Lee, Y. J.  
884 Jeong, H.-W. Nam, Y. Nam, H.-S. Hoe, Dasatinib regulates LPS-induced microglial and  
885 astrocytic neuroinflammatory responses by inhibiting AKT/STAT3 signaling. *J.*  
886 *Neuroinflammation* **16**, 190 (2019).
- 887 52. L. T. Zheng, J. Hwang, J. Ock, M. G. Lee, W.-H. Lee, K. Suk, The antipsychotic spiperone  
888 attenuates inflammatory response in cultured microglia via the reduction of proinflammatory  
889 cytokine expression and nitric oxide production. *J. Neurochem.* **107**, 1225-1235 (2008).
- 890 53. G. Dhawan, C. K. Combs, Inhibition of Src kinase activity attenuates amyloid associated  
891 microgliosis in a murine model of Alzheimer's disease. *J. Neuroinflammation* **9**, 117 (2012).
- 892 54. M. W. Salter, B. Stevens, Microglia emerge as central players in brain disease. *Nat. Med.* **23**,  
893 1018-1027 (2017).
- 894 55. A. King, The search for better animal models of Alzheimer's disease. *Nature* **559**, S13-S13  
895 (2018).
- 896 56. M. Ohgidani, T. A. Kato, S. Kanba, Introducing directly induced microglia-like (iMG) cells  
897 from fresh human monocytes: a novel translational research tool for psychiatric disorders.  
898 *Front. Cell. Neurosci.* **9**, 184 (2015).
- 899 57. L. Bollmann, D. E. Koser, R. Shahapure, H. O. B. Gautier, G. A. Holzapfel, G. Scarcelli, M.  
900 C. Gather, E. Ulbricht, K. Franze, Microglia mechanics: immune activation alters traction  
901 forces and durotaxis. *Front. Cell. Neurosci.* **9**, 363-363 (2015).
- 902 58. S. Balasubramanian, J. A. Packard, J. B. Leach, E. M. Powell, Three-dimensional  
903 environment sustains morphological heterogeneity and promotes phenotypic progression  
904 during astrocyte development. *Tissue Engineering Part A* **22**, 885-898 (2016).
- 905 59. Z.-N. Zhang, B. C. Freitas, H. Qian, J. Lux, A. Acab, C. A. Trujillo, R. H. Herai, V. A. N.  
906 Huu, J. H. Wen, S. Joshi-Barr, Layered hydrogels accelerate iPSC-derived neuronal  
907 maturation and reveal migration defects caused by MeCP2 dysfunction. *Proc. Natl. Acad.*  
908 *Sci. USA* **113**, 3185-3190 (2016).
- 909 60. D. M. Cairns, K. Chwalek, Y. E. Moore, M. R. Kelley, R. D. Abbott, S. Moss, D. L. Kaplan,  
910 Expandable and rapidly differentiating human induced neural stem cell lines for multiple  
911 tissue engineering applications. *Stem cell reports* **7**, 557-570 (2016).
- 912 61. R. T. Y. Haw, C. K. Tong, A. Yew, H. C. Lee, J. B. Phillips, S. Vidyadaran, A three-  
913 dimensional collagen construct to model lipopolysaccharide-induced activation of BV2  
914 microglia. *J. Neuroinflammation* **11**, 134 (2014).
- 915 62. A. Nimmerjahn, F. Kirchhoff, F. Helmchen, Resting microglial cells are highly dynamic  
916 surveillants of brain parenchyma in vivo. *Science* **308**, 1314-1318 (2005).



- 917 63. P. J. Paasila, D. S. Davies, J. J. Kril, C. Goldsbury, G. T. Sutherland, The relationship  
918 between the morphological subtypes of microglia and Alzheimer's disease neuropathology.  
919 *Brain Pathol.* **29**, 726-740 (2019).
- 920 64. D. S. Davies, J. Ma, T. Jegathees, C. Goldsbury, Microglia show altered morphology and  
921 reduced arborization in human brain during aging and Alzheimer's disease. *Brain Pathol.* **27**,  
922 795-808 (2017).
- 923 65. C. Cserép, B. Pósfai, N. Lénárt, R. Fekete, Z. I. László, Z. Lele, B. Orsolits, G. Molnár, S.  
924 Heindl, A. D. Schwarcz, Microglia monitor and protect neuronal function through specialized  
925 somatic purinergic junctions. *Science* **367**, 528-537 (2020).
- 926 66. S. A. Liddel, K. A. Guttenplan, L. E. Clarke, F. C. Bennett, C. J. Bohlen, L. Schirmer, M.  
927 L. Bennett, A. E. Münch, W.-S. Chung, T. C. Peterson, D. K. Wilton, A. Frouin, B. A.  
928 Napier, N. Panicker, M. Kumar, M. S. Buckwalter, D. H. Rowitch, V. L. Dawson, T. M.  
929 Dawson, B. Stevens, B. A. Barres, Neurotoxic reactive astrocytes are induced by activated  
930 microglia. *Nature* **541**, 481-487 (2017).
- 931 67. E. Masliah, M. Mallory, M. Alford, R. Deteresa, T. Saitoh, PDGF is associated with neuronal  
932 and glial alterations of Alzheimer's disease. *Neurobiol. Aging* **16**, 549-556 (1995).
- 933 68. M. I. Assaraf, Z. Diaz, A. Liberman, W. H. Miller Jr, Z. Arvanitakis, Y. Li, D. A. Bennett, H.  
934 M. Schipper, Brain erythropoietin receptor expression in Alzheimer disease and mild  
935 cognitive impairment. *J. Neuropathol. Exp. Neurol.* **66**, 389-398 (2007).
- 936 69. M. Belkhef, H. Rafa, O. Medjeber, A. Arroul-Lammali, N. Behairi, M. Abada-Bendib, M.  
937 Makrelouf, S. Belarbi, A. N. Masmoudi, M. Tazir, IFN- $\gamma$  and TNF- $\alpha$  are involved during  
938 Alzheimer disease progression and correlate with nitric oxide production: a study in Algerian  
939 patients. *J. Interferon Cytokine Res.* **34**, 839-847 (2014).
- 940 70. S. Monteiro, F. M. Ferreira, V. Pinto, S. Roque, M. Morais, D. de Sá-Calçada, C. Mota, M.  
941 Correia-Neves, J. J. Cerqueira, Absence of IFN $\gamma$  promotes hippocampal plasticity and  
942 enhances cognitive performance. *Transl. Psychiatry* **6**, e707-e707 (2016).
- 943 71. A. Y. Lai, J. McLaurin, Clearance of amyloid- $\beta$  peptides by microglia and macrophages: the  
944 issue of what, when and where. *Future Neurol.* **7**, 165-176 (2012).
- 945 72. T. Bolmont, F. Haiss, D. Eicke, R. Radde, C. A. Mathis, W. E. Klunk, S. Kohsaka, M.  
946 Jucker, M. E. Calhoun, Dynamics of the microglial/amyloid interaction indicate a role in  
947 plaque maintenance. *J. Neurosci.* **28**, 4283-4292 (2008).
- 948 73. A. G. Souza, I. B. B. Silva, E. Campos-Fernandez, L. S. Barcelos, J. B. Souza, K. Marangoni,  
949 L. R. Goulart, V. Alonso-Goulart, Comparative assay of 2D and 3D cell culture models:  
950 proliferation, gene expression and anticancer drug response. *Curr. Pharm. Des.* **24**, 1689-  
951 1694 (2018).
- 952 74. M. Zietarska, C. M. Maugard, A. Filali-Mouhim, M. Alam-Fahmy, P. N. Tonin, D. M.  
953 Provencher, A.-M. Mes-Masson, Molecular description of a 3D in vitro model for the study  
954 of epithelial ovarian cancer (EOC). *Mol. Carcinog.* **46**, 872-885 (2007).
- 955 75. X. J. Li, A. V. Valadez, P. Zuo, Z. Nie, Microfluidic 3D cell culture: potential application for  
956 tissue-based bioassays. *Bioanalysis* **4**, 1509-1525 (2012).

957 **Table S1. qRT-PCR primer sequences.**

| <b>Primer</b>                  | <b>Forward sequence</b>       | <b>Reverse sequence</b>        | <b>Size (bp)</b> |
|--------------------------------|-------------------------------|--------------------------------|------------------|
| <i>18S</i>                     | TTCGAGGCCCTGTAATT<br>GGA      | GCAGCAACTTTAATATA<br>CGCTATTGG | 123              |
| <i>IBA1</i>                    | TGCCATCCTAAAAATG<br>ATCCTGATG | AGATAGCTTTCTTGGCTG<br>GGG      | 86               |
| <i>CD45</i>                    | GCAGCTAGCAAGTGGT<br>TTGTTC    | AAACAGCATGCGTCCTT<br>TCTC      | 92               |
| <i>PROS1</i>                   | TTGCACTTGTAACCAG<br>GTTGG     | CAGGAACAGTGGTAACT<br>TCCAG     | 132              |
| <i>GAS6</i>                    | CTCTCTCTGTGGCACTG<br>GTA      | CCTTGATCTCCATTAGGG<br>CCAA     | 105              |
| <i>GPR34</i>                   | CCTGATGTCCAGTAAC<br>ATTCGC    | CATGCAGGGAGTATCCT<br>GGT       | 116              |
| <i>TREM2</i>                   | TCTTTGTACACAGAGCTG<br>TCC     | TCATAGGGGCAAGACAC<br>CTG       | 88               |
| <i>TMEM119</i>                 | CTTCCTGGATGGGATA<br>GTGGAC    | GCACAGACGATGAACAT<br>CAGC      | 96               |
| <i>KI67</i>                    | GAGGTGTGCAGAAAAT<br>CCAAA     | CTGTCCCTATGACTTCTG<br>GTTGT    | 78               |
| <i>SOX2</i>                    | CCACCTACAGCATGTCC<br>TACTCG   | GGGAGGAAGAGGTAACC<br>ACAGG     | 117              |
| <i>NESTIN</i>                  | CTCAGCTTTCAGGACCC<br>CAA      | GTCTCAAGGGTAGCAGG<br>CAA       | 183              |
| <i>GLAST</i>                   | GGTTGCTGCAAGCACT<br>CATCAC    | CACGCCATTGTTCTCTTC<br>CAGG     | 95               |
| <i>BLBP</i>                    | GGCTTTGCCACTAGGC<br>AGG       | TGACCACTTTGTCTCCTT<br>CTTGA    | 76               |
| <i>GFAP</i>                    | GAGGTTGAGAGGGACA<br>ATCTGG    | GTGGCTTCATCTGCTTCC<br>TGTC     | 128              |
| <i>GLT-1</i>                   | TAGCCGCCATCTTTATA<br>GCC      | CGGCTGTCAGAATGAGG<br>AGC       | 150              |
| <i>PLP-1</i>                   | GGCCACTGGATTGTGTT<br>TCT      | AGGTGGTCCAGGTGTTG<br>AAG       | 386-491          |
| <i>GalC</i>                    | GCAACCTCCCGACTTCT<br>AGTA     | ACCACTCGTATCCTCGG<br>AAATA     | 199              |
| <i>TBR2<br/>(EOMES)</i>        | CGGCCTCTGTGGCTCAA<br>A        | AAGGAAACATGCGCCTG<br>C         | 76               |
| <i>MAPT</i>                    | CTCGCATGGTCAGTAA<br>AAGCAA    | GGGTTTTTGTGCTGGAATCC<br>TGGT   | 153              |
| <i>Synaptophysin<br/>(SYP)</i> | CTGCAATGGGTCTTCGC<br>CA       | ACTCTCGGTCTTGTGGC<br>AC        | 96               |
| <i>PILRB</i>                   | CCATCAAGGGGACCAA<br>ACTCA     | TCTGAGTGCCCTTTGCTT<br>TC       | 118              |
| <i>BAX</i>                     | TGGCAGCTGACATGTTT<br>TCTGAC   | TCACCAACCACCCTGG<br>TCTT       | 195              |
| <i>IL-6</i>                    | TGCAATAACCACCCT<br>GACC       | TGCGCAGAATGAGATGA<br>GTTG      | 104              |

|                                |                             |                             |     |
|--------------------------------|-----------------------------|-----------------------------|-----|
| <i>IL-8</i>                    | AGACAGCAGAGCACAC<br>AAGC    | ATGGTTCCTTCCGGTGGT          | 62  |
| <i>IL-10</i>                   | TGCTGGAGGACTTTAA<br>GGGTTA  | GATGCCTTTCTCTTGGAG<br>CTTA  | 254 |
| <i>TNF-<math>\alpha</math></i> | CAGCCTCTTCTCCTTCC<br>TGAT   | GCCAGAGGGCTGATTAG<br>AGA    | 123 |
| <i>TGF-<math>\beta</math></i>  | CGCGTGCTAATGGTGG<br>AAA     | CTCGGAGCTCTGATGTG<br>TTGAA  | 97  |
| <i>IL-1<math>\beta</math></i>  | AATCTGTACCTGTCCTG<br>CGTGTT | TGGGTAATTTTGGGATC<br>TACTCT | 78  |
| <i>IL-18</i>                   | AACAACTATTTGTTCG<br>AGGAAT  | TGCCACAAAGTTGATGC<br>AAT    | 72  |

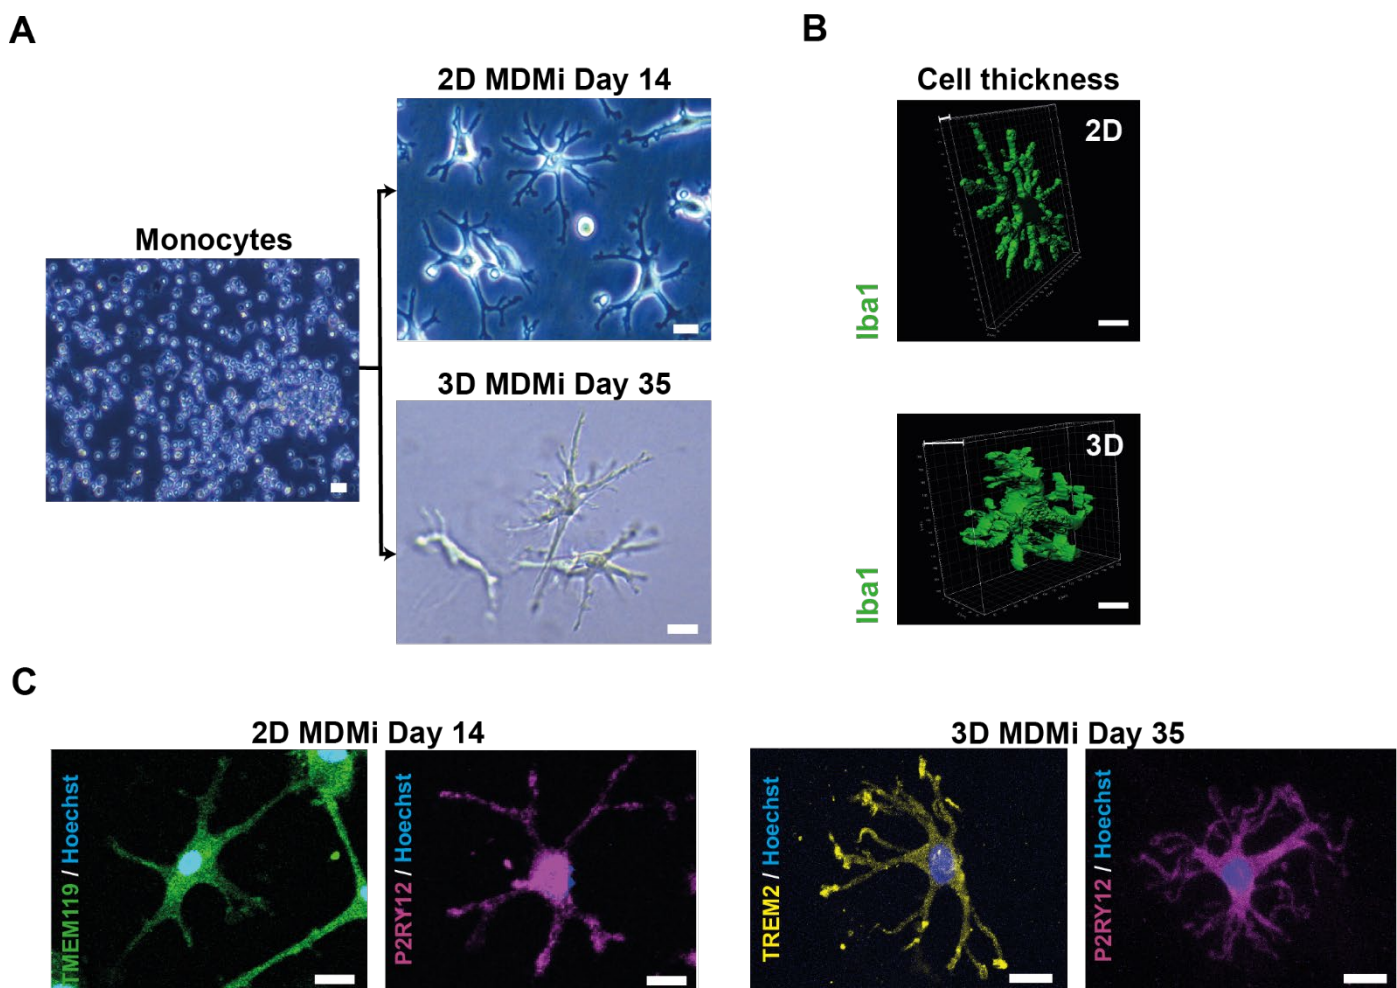

958 **Fig. S1. 2D and 3D MDMi show different cell thickness and positive immunostaining for**  
 959 **microglia-enriched markers.** (A) Representative bright field images of monocytes and 2D and 3D  
 960 MDMi after 14 (top) or 35 (bottom) days of differentiation, respectively. Scale bars, 25  $\mu$ m. (B)  
 961 3D reconstruction images of Iba1-stained MDMi and thickness of 2D and 3D MDMi. Scale bars, 25  
 962  $\mu$ m. (C) Immunofluorescence of 2D and 3D MDMi for TMEM119, P2RY12 and TREM2. Scale bars, 25  
 963  $\mu$ m.  
 964

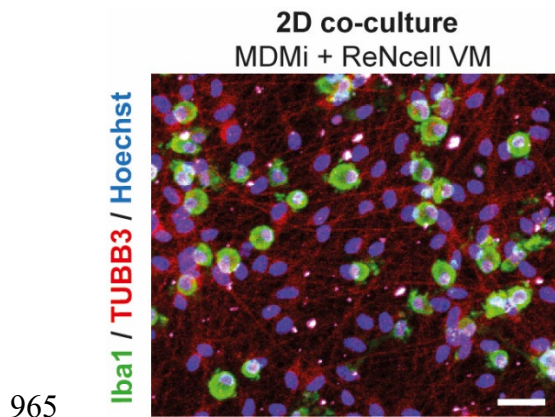

965

966

967

968

969

**Fig. S2. Characterisation of 2D MDMi and ReNcell VM co-cultures.** MDMi co-culture with ReNcell VM-derived neuro-glial cells in 2D is insufficient for monocyte differentiation into MDMi, as monocytes retain a round morphology after 40 days in 2D co-culture. MDMi were stained for Iba1 and ReNcell VM were stained for  $\beta$ 3-tubulin (TUBB3). Scale bar, 100  $\mu$ m.

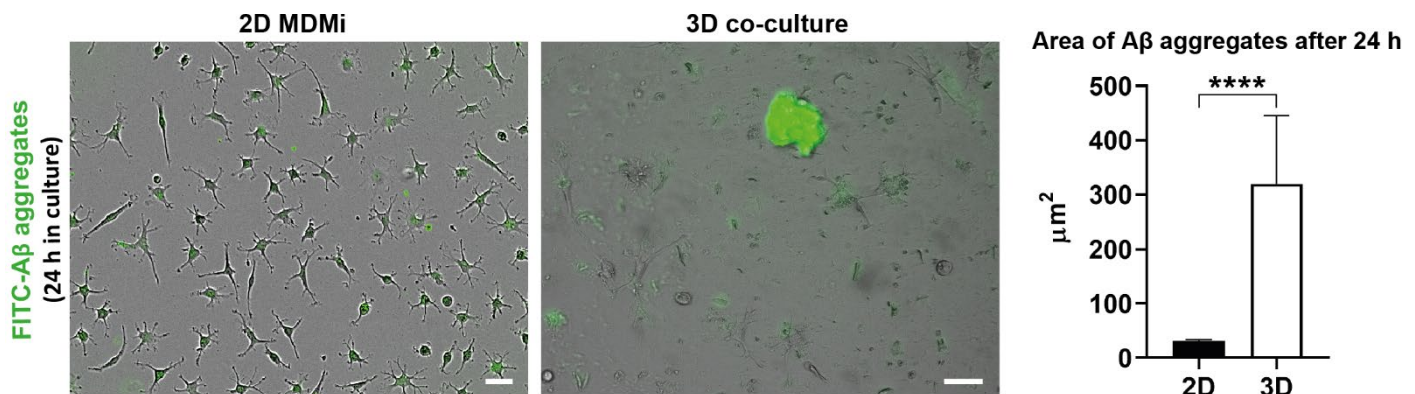

970

971

972

973

974

**Fig. S3. FITC-A $\beta$  peptides form larger aggregates in 3D compared to 2D after 24 h in culture.** FITC-A $\beta$  peptides were added to 2D MDMi and 3D co-cultures. Imaging was conducted following incubation for 24 h. Area of A $\beta$  aggregates ( $\mu$ m<sup>2</sup>) was quantified for comparison between the 2D MDMi ( $n = 3$ ) and 3D co-cultures ( $n = 3$ ). Scale bars, 100  $\mu$ m. Data are presented as mean  $\pm$  SEM. Mann-Whitney test, two-tailed; \*\*\*\* $P < 0.0001$ .

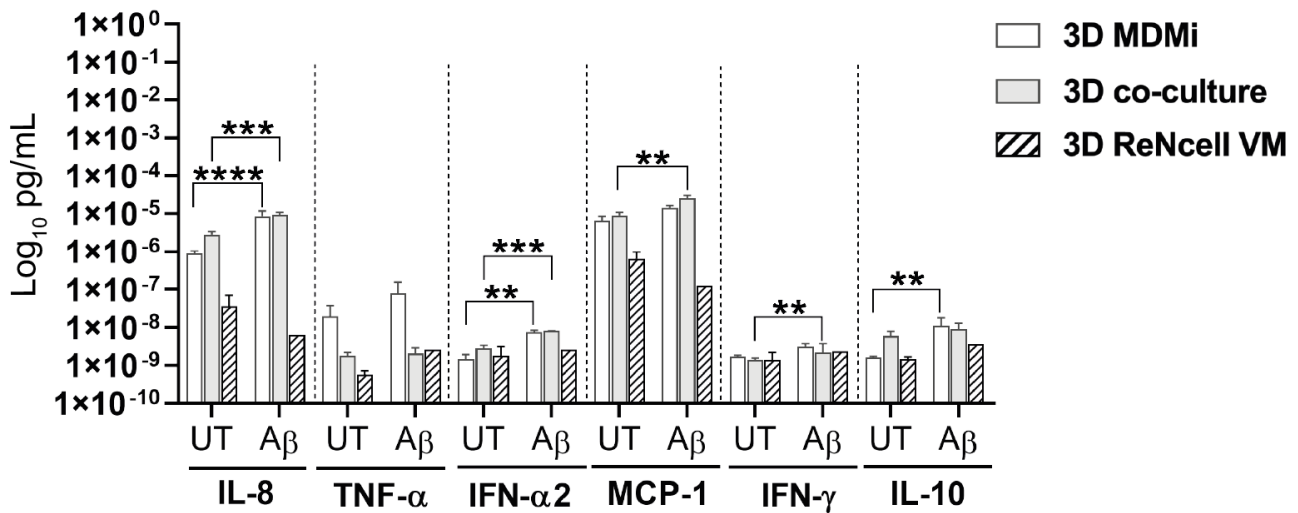

975 **Fig. S4. Pro-inflammatory cytokine secretion profiles of 3D MDMi, 3D co-culture and 3D**  
 976 **ReNcell VM.** Concentration of secreted pro-inflammatory cytokines IL-8, TNF-α, IFN-α2, MCP-1,  
 977 IFN-γ and IL-10 by 3D MDMi ( $n = 2$ ) and ReNcell VM ( $n = 1$ ) mono-cultures and 3D co-cultures ( $n$   
 978  $= 3$ ) upon exposure to FITC-Aβ aggregates for 7 days. Data are presented as mean ± SEM. Unpaired  
 979 Student's  $t$  test with or without Welch's correction, two-tailed; \*\* $P < 0.01$ , \*\*\* $P < 0.001$ , \*\*\*\* $P <$   
 980  $0.0001$ .

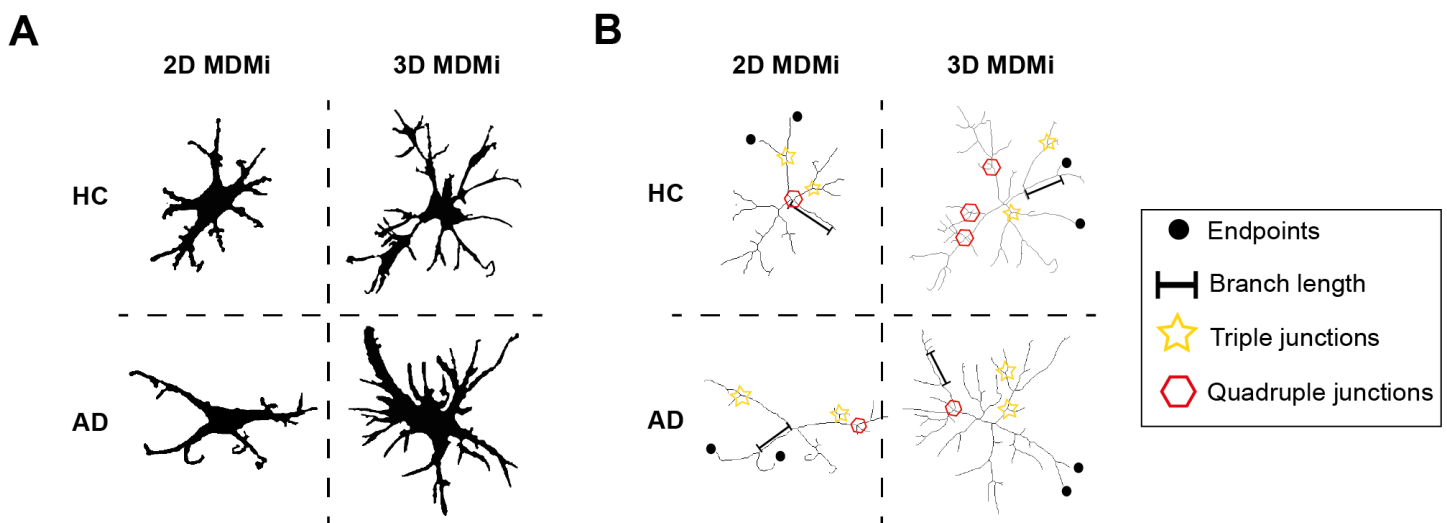

981 **Fig. S5. Depiction of morphological parameter measurements in HC and AD MDMi in 2D and**  
 982 **3D mono-cultures.** (A) Binary and (B) skeleton images of HC and AD MDMi in 2D and 3D mono-  
 983 cultures showing the morphological parameters (endpoints, branch length, triple and quadruple  
 984 junctions) analysed to estimate the branched structure and complexity of MDMi.



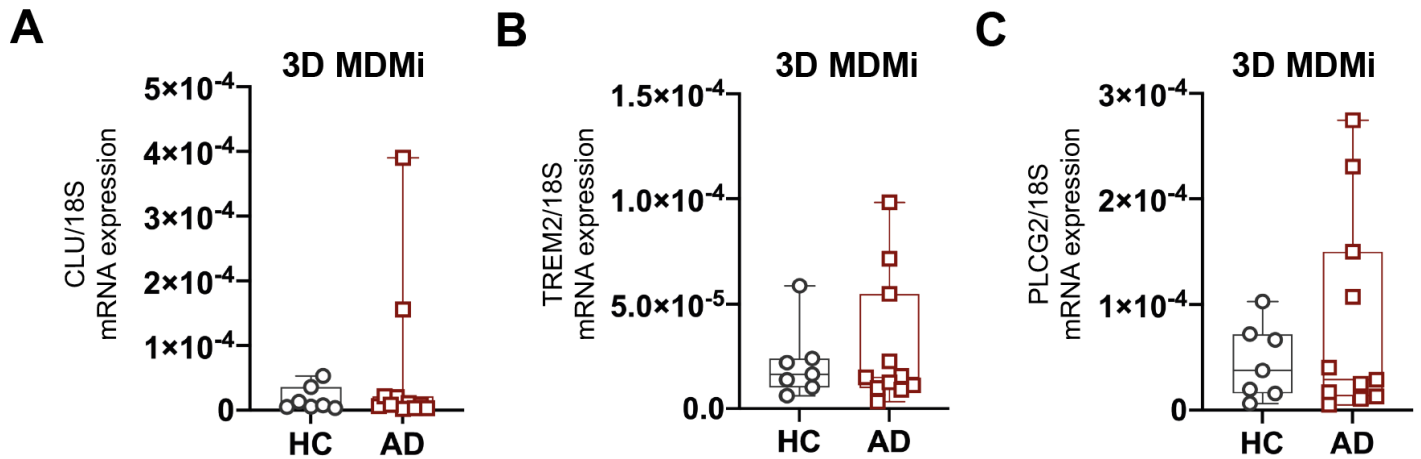

985 **Fig. S6. Gene expression of AD risk genes in HC and AD 3D MDMi.** qRT-PCR quantification of  
 986 (A) *CLU*, (B) *TREM2* and (C) *PLCG2* mRNA expression in 3D MDMi mono-cultures from HC ( $n =$   
 987 7) and AD ( $n = 11$ ) donors. Data are presented as mean  $\pm$  SD. Each single data point represents one  
 988 biological replicate. Unpaired Student's  $t$  test with or without Welch's correction, two-tailed.

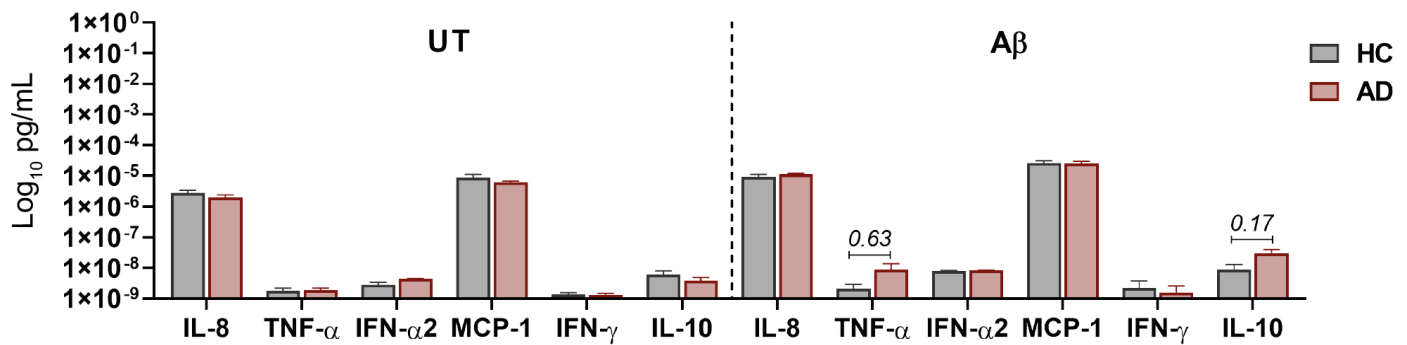

989 **Fig. S7. Inflammatory cytokine secretion by HC and AD 3D co-cultures under untreated and**  
 990  **$A\beta$ -treated conditions.** Concentration of secreted IL-8, TNF- $\alpha$ , IFN- $\alpha$ 2, MCP-1, IFN- $\gamma$  and IL-10 are  
 991 displayed in HC ( $n = 3$ ) and AD ( $n = 4$ ) MDMi 3D co-cultures. Data are presented as mean  $\pm$  SEM.  
 992 Unpaired Student's  $t$  test with or without Welch's correction, two-tailed.



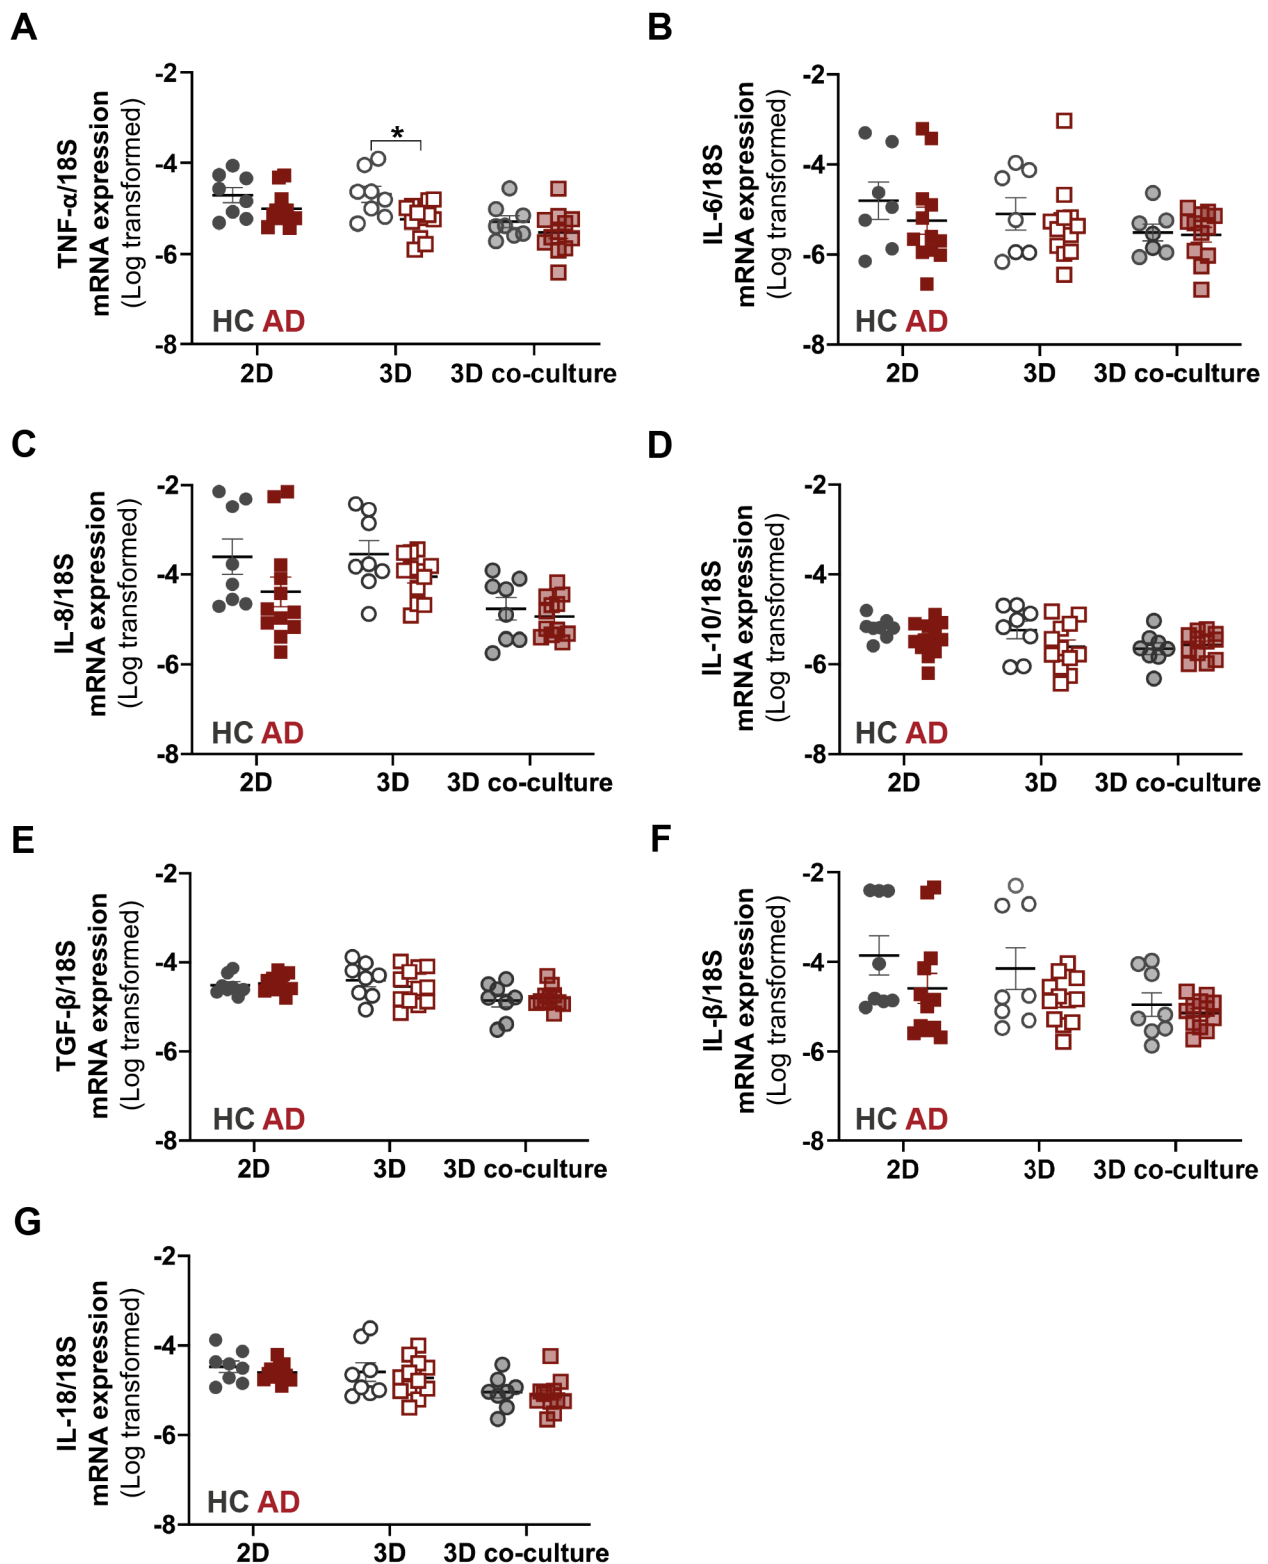

993 **Fig. S8. Cytokine expression profiles in HC and AD MDMi 2D and 3D mono-cultures and 3D**  
994 **co-cultures.** Log-transformed mRNA expression of the inflammatory cytokines (A) TNF- $\alpha$ , (B) IL-6,  
995 (C) IL-8, (D) IL-10, (E) TGF- $\beta$ , (F) IL-1 $\beta$  and (G) IL-18 in HC ( $n = 7-8$ ) and AD ( $n = 12$ ) MDMi  
996 cultures. Data are presented as mean  $\pm$  SD. Each single data point represents one biological replicate.  
997 Comparisons between HC and AD MDMi in either culture format were performed using unpaired  
998 Student's  $t$  test with or without Welch's correction, two-tailed; \* $P < 0.05$ .

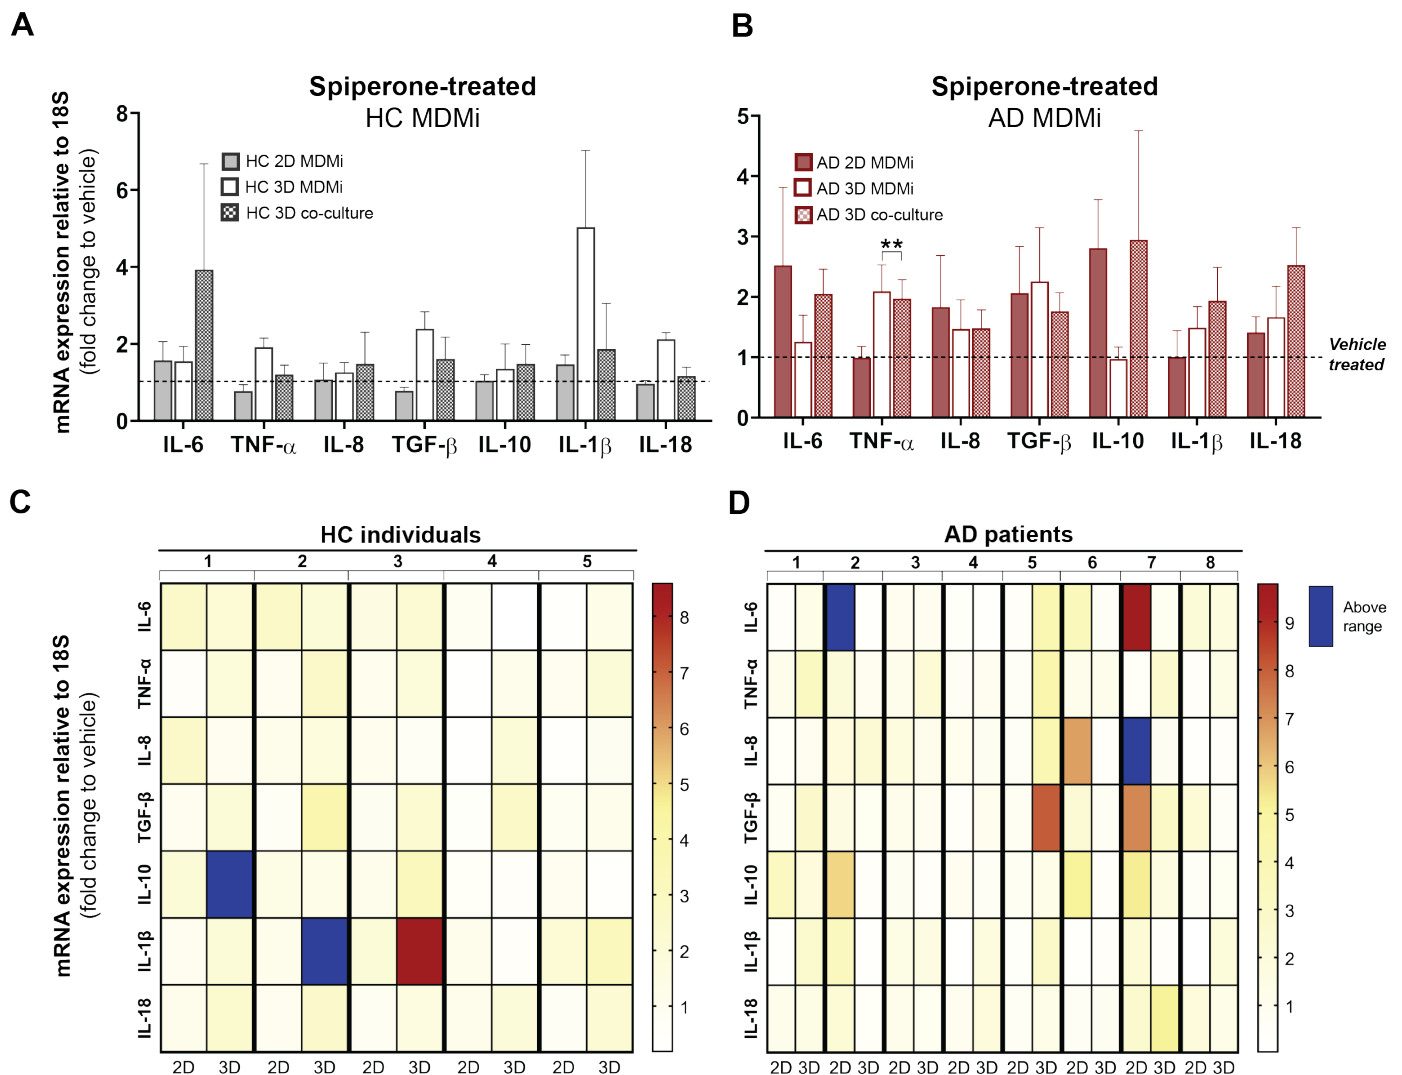

999

1000

1001

1002

1003

1004

1005

1006

1007

1008

1009

**Fig. S9. Spiperone treatment induces cytokine expression responses that differ between culture format and are heterogeneous among HC and AD MDMi.** Fold change in cytokine mRNA expression levels following 24 h exposure to 1 $\mu$ M spiperone compared to vehicle (DMSO)-treated cultures in **(A)** HC ( $n = 5$ ) and **(B)** AD ( $n = 8$ ) 2D and 3D MDMi mono-cultures and 3D co-cultures. Dotted black lines represent baseline responses of vehicle-treated cultures. Heat maps showing **(C)** HC ( $n = 5$ ) and **(D)** AD ( $n = 8$ ) donors-specific changes in mRNA expression from MDMi mono-cultures in 2D and 3D. Red-yellow colour spectrum represents relative fold change of mRNA expression after spiperone treatment compared to vehicle. Expression changes falling outside the displayed range are indicated in dark blue. Data are presented as mean  $\pm$  SEM. One-way ANOVA with Dunnett's multiple comparison test;  $**P < 0.01$ .
